# Supplementary material for: Emissions-intensive and trade-exposed industries: technological innovation and climate policy solutions to achieve net-zero emissions by 2050
Source: Royal Society of Chemistry journal article supplement (doi:10.1039/d3su00335c), 2023-12-22
Supplement: d3su00335c2.pdf [file d3su00335c2.pdf]

## Supplementary material

### S1 Cement sectors in BC, including technology or process type and name, description & solutions, state of development, GHG impact, energy impact, Cost, and reference type with its reference link. (PICS' research project: Technological Innovation and Climate Policy Solutions to Achieve Net-zero Emission by 2050 for EITE-Industries in BC and Canada)

| Industry                                      | Technology or process type                                                                                                                                                                                                                                                                                                                | Technology or process name                                                                                                                                                                                                                                                                                                                                                                                                                                                                                                                                                                                                                    | Description and Solutions                                                                                                                                                                                                                                                                                                                                                                                                                                                                                                                                                                                                                                                                                                                                                                                 | State of development                                                                                         | GHG impact                                                                                                    | Energy impact                                                                                                                             | Cost                                                             | Reference type                                                                                                                                                                                                                                         | Reference links                                                                                                                                                                                                                                                     |
|-----------------------------------------------|-------------------------------------------------------------------------------------------------------------------------------------------------------------------------------------------------------------------------------------------------------------------------------------------------------------------------------------------|-----------------------------------------------------------------------------------------------------------------------------------------------------------------------------------------------------------------------------------------------------------------------------------------------------------------------------------------------------------------------------------------------------------------------------------------------------------------------------------------------------------------------------------------------------------------------------------------------------------------------------------------------|-----------------------------------------------------------------------------------------------------------------------------------------------------------------------------------------------------------------------------------------------------------------------------------------------------------------------------------------------------------------------------------------------------------------------------------------------------------------------------------------------------------------------------------------------------------------------------------------------------------------------------------------------------------------------------------------------------------------------------------------------------------------------------------------------------------|--------------------------------------------------------------------------------------------------------------|---------------------------------------------------------------------------------------------------------------|-------------------------------------------------------------------------------------------------------------------------------------------|------------------------------------------------------------------|--------------------------------------------------------------------------------------------------------------------------------------------------------------------------------------------------------------------------------------------------------|---------------------------------------------------------------------------------------------------------------------------------------------------------------------------------------------------------------------------------------------------------------------|
| Cement                                        | Current Technology                                                                                                                                                                                                                                                                                                                        | Portland Cement                                                                                                                                                                                                                                                                                                                                                                                                                                                                                                                                                                                                                               | Calcium compounds, silica, alumina and iron oxide are placed in rotating kiln at 1500C.                                                                                                                                                                                                                                                                                                                                                                                                                                                                                                                                                                                                                                                                                                                   | Current Standard                                                                                             | 0.5371 tCO <sub>2</sub> t of clinker                                                                          | 5.63 TJ/t clinker                                                                                                                         |                                                                  |                                                                                                                                                                                                                                                        | Canadian Industrial Energy End Use Data Analysis Centre (CIEEDAC).<br><a href="http://www.cfu.ca/cieedac.html">http://www.cfu.ca/cieedac.html</a>                                                                                                                   |
| Cement                                        |                                                                                                                                                                                                                                                                                                                                           |                                                                                                                                                                                                                                                                                                                                                                                                                                                                                                                                                                                                                                               | This report has been prepared for the Department of Energy and Climate Change and the Department for Business, Innovation and Skills.                                                                                                                                                                                                                                                                                                                                                                                                                                                                                                                                                                                                                                                                     |                                                                                                              |                                                                                                               |                                                                                                                                           | Uncertain                                                        | Industrial Decarbonisation & Energy Efficiency Roadmaps to 2050<br>Cement                                                                                                                                                                              | <a href="https://assets.publishing.service.gov.uk/government/uploads/system/uploads/attachment_mim_datafile/56574/Cement_Report.pdf">https://assets.publishing.service.gov.uk/government/uploads/system/uploads/attachment_mim_datafile/56574/Cement_Report.pdf</a> |
| Cement - Lafarge Canada Inc. (Richmond)       | to replace virgin aggregates with a recycled asphalt pavement (RAP) mix. One of several circular initiatives, the process of replacing virgin aggregates with recycled asphalt pavement significantly diminishes the depletion of natural resources while reducing carbon emissions while diverting truckloads of asphalt from landfills. | PHASE I – The Contaminant Program: Reduce harmful organic and inorganic substances, such as sulphur dioxide, dust and soot, as well as nitrogen oxides, from cement flue gas. • PHASE II – The CO <sub>2</sub> Capture Program: Separate the CO <sub>2</sub> from flue gas using a customized for-cement version of Invenity's carbon capture technology at pilot scale. • PHASE III – The CO <sub>2</sub> Reuse Program: Prepare post-combustion CO <sub>2</sub> for reuse and support the economical assessment and demonstration of CO <sub>2</sub> conversion technologies onsite, such as CO <sub>2</sub> injected concrete and fly ash. | Solutions:<br>1. Bioislands to use as fuel in cement manufacturing at the Richmond plant received \$2.9 million in funding for the capital investment in a silo designed to co-process bioislands as low carbon fuel for the Richmond cement kiln.<br>2. Project CO <sub>2</sub> MENT (flue gas from the plant's manufacturing facility is now captured through Invenity's equipment – reducing the amount of gases released into the atmosphere. The system purifies the cement flue gas by trapping its contaminants to enable an efficient and durable CO <sub>2</sub> capture process. Now that Phase II is underway, Phase III – a demonstration of CO <sub>2</sub> utilization solutions such as reinjecting it into low-carbon fuels, CO <sub>2</sub> concrete, and fly ash – will begin in 2020.) | Pilot project (Invenity Partners with Total and Lafarge to Bring Carbon Capture Program to British Columbia) | Bioislands, when replacing coal, will reduce GHGs by approximately 5,000 tonnes of CO <sub>2</sub> e per year | Along with carbon capture, the plant uses a \$28-million system to use non-recyclable waste as fuel, directing it away from BC landfills. | Uncertain                                                        | Website report : <a href="https://www.lafarge.ca/en/invenity-partners-total-and-lafarge-bring-carbon-capture-program-british-columbia">https://www.lafarge.ca/en/invenity-partners-total-and-lafarge-bring-carbon-capture-program-british-columbia</a> | <a href="https://assets.publishing.service.gov.uk/government/uploads/system/uploads/attachment_mim_datafile/56574/Cement_Report.pdf">https://assets.publishing.service.gov.uk/government/uploads/system/uploads/attachment_mim_datafile/56574/Cement_Report.pdf</a> |
| Cement - Lehigh Hanson Materials Ltd. (Delta) | Reducing the proportion of clinker is the most important level when it comes to minimizing energy consumption and CO <sub>2</sub> emissions                                                                                                                                                                                               |                                                                                                                                                                                                                                                                                                                                                                                                                                                                                                                                                                                                                                               | Solutions: 1. Development of alternative clinker 2. CCU/CCS. 3. Developing composite cements that contain less clinker.                                                                                                                                                                                                                                                                                                                                                                                                                                                                                                                                                                                                                                                                                   | the clinker proportion in cement in 2019 is 74.5%                                                            | 21% achieved in 2019 and by 2030 will be 30%                                                                  | -15%                                                                                                                                      | kg CO <sub>2</sub> e emission per tonne of cement in 2019, 589.8 | Sustainability Report 2019 (page 35)                                                                                                                                                                                                                   | <a href="https://www.lehighhanson.com/industry-stories/lehighhanson-sustainability-report-2019.pdf">https://www.lehighhanson.com/industry-stories/lehighhanson-sustainability-report-2019.pdf</a>                                                                   |

### S2 Pulp & Paper sectors in BC, including technology or process type, description & solutions, state of development, GHG impact, energy impact, cost, and reference type with its reference link. (PICS' research project: Technological Innovation and Climate Policy Solutions to Achieve Net-Zero Emission by 2050 for EITE-Industries in BC and Canada)

| Industry                                                                  | Technology or process type                                                                                                                                                                                                                                                                                   | Technology or process name                                                                                                                                                                                                                                                                                          | Description and Solutions                                                                                                                                                                                                                                                                                                                                                                                                                                                                                                                                                                                                                                                                                                                                    | State of development                                                                                                                               | GHG impact                                                                                                                                                                                                                                                                            | Energy impact                                                                                                                                                                                                                                                                                                                                                                                                                                                                                                                                                       | Cost                                                                                                                                  | Reference type                                                   | Reference links                                                                                                                                                                                                                                                   |
|---------------------------------------------------------------------------|--------------------------------------------------------------------------------------------------------------------------------------------------------------------------------------------------------------------------------------------------------------------------------------------------------------|---------------------------------------------------------------------------------------------------------------------------------------------------------------------------------------------------------------------------------------------------------------------------------------------------------------------|--------------------------------------------------------------------------------------------------------------------------------------------------------------------------------------------------------------------------------------------------------------------------------------------------------------------------------------------------------------------------------------------------------------------------------------------------------------------------------------------------------------------------------------------------------------------------------------------------------------------------------------------------------------------------------------------------------------------------------------------------------------|----------------------------------------------------------------------------------------------------------------------------------------------------|---------------------------------------------------------------------------------------------------------------------------------------------------------------------------------------------------------------------------------------------------------------------------------------|---------------------------------------------------------------------------------------------------------------------------------------------------------------------------------------------------------------------------------------------------------------------------------------------------------------------------------------------------------------------------------------------------------------------------------------------------------------------------------------------------------------------------------------------------------------------|---------------------------------------------------------------------------------------------------------------------------------------|------------------------------------------------------------------|-------------------------------------------------------------------------------------------------------------------------------------------------------------------------------------------------------------------------------------------------------------------|
| Dorlat Inc.                                                               | Chemical Pulp Mills-The manufacturing of pulp and paper requires wood fiber, chemicals and energy                                                                                                                                                                                                            | Chemical Pulp Mills: the conversion of Ashdown mill to 100% softwood and buff pulp in early 2021. Airaid and ultralight laminated cores are highly customized with long and technical development, qualification and sales process.                                                                                 | Kamloops Mill (SFO), one line Fiberline Pulp Capacity and 400,000 ADMT (on air dry metric ton). The fiber used at Kamloops pulp mill is softwood, originating mostly from third-party sawmill operations in the southern-interior part of British Columbia. The Company does not expect its facilities to be disproportionately affected by these measures compared to the other pulp and paper producers located in these provinces. (The province of Quebec has a greenhouse gases ("GHG") cap-and-trade system with reduction targets.)                                                                                                                                                                                                                   | Commercial. All of our pulp production capacity is located in the U.S. or in Canada, and we sell approximately 54% of our pulp to other countries. | Grand Total t CO <sub>2</sub> e = 137295.57                                                                                                                                                                                                                                           | Energy sources include: biomass, natural gas and electricity. 73% of the total energy required to manufacture products comes from renewable fuels: bark and spent pulping liquors, generated as byproducts from our manufacturing processes. The remainder of the energy comes from smaller amounts of other fossil fuels and purchased steam procured under supply contracts.                                                                                                                                                                                      | British Columbia has a carbon tax that applies to the purchase of fossil fuels within the province.                                   | ANNUAL REPORT FOR THE YEAR ENDED DEC. 31, 2020                   | <a href="https://www.dorlat.com/sites/default/files/2020-03/2020%20Annual%20Report%20-%202020.pdf">https://www.dorlat.com/sites/default/files/2020-03/2020%20Annual%20Report%20-%202020.pdf</a>                                                                   |
| Howe Sound Pulp & Paper Corporation                                       | Kraft Digerter, bleach plant and utility island-NBSX Pulp-455,000 tonnes per year* Deep-sea port facility for economic access to Pacific Rim economies* Self-generated green power exported to BC's 60th Coastal BC fibre supply dominated by sawmill residual chips and pulp logs                           | Chemical Pulp Mills: The Paper Excellence Howe Sound Pulp and Paper facility is a leading producer of high quality Northern Bleached Softwood Kraft pulps.                                                                                                                                                          | ISO 14001 environmental management system certified 94% of HSP's energy comes from renewable sources with 49% reduction in greenhouse gases since 1990/94% of HSP's power use is self-generated green electricity 100% of HSP's wood fibre is low risk using the FSC risk assessment process.Certified to FSC Controlled Wood, FSC® PEFC® and SPM Chain of Custody standards.Strictest emission standards on the BC coast                                                                                                                                                                                                                                                                                                                                    | Commercial.                                                                                                                                        | Grand Total t CO <sub>2</sub> e = 144,661.8                                                                                                                                                                                                                                           |                                                                                                                                                                                                                                                                                                                                                                                                                                                                                                                                                                     |                                                                                                                                       | Fact Sheet 2020                                                  | <a href="https://paperexcellence.com/mill-location/howe-sound/">https://paperexcellence.com/mill-location/howe-sound/</a>                                                                                                                                         |
| Canfor Pulp Ltd. Prince George Pulp and Paper-Intercontinental Pulp Mills | Enhanced - ECF Process-Chemical Pulp Mills. A sawmill energy modelling project was initiated that will ultimately have energy models developed for all of Canfor's B.C. sawmills in 2020, and will be able to account for the electricity savings made by individual projects. Biomass and clean electricity | SR: Using Technology to Enhance Operational Efficiencies Page 53, Sawmills - Greenhouse Gas Emissions Page 54, Pulp Mills - Greenhouse Gas Emissions Page 72, SR: Sawmills - Manufacturing Compliance Pages 68 - 79, Pulp Mills - Prince George Airshed Page 76, Canfor Pulp Sustainable Product Declaration Sheets | 17 manufacturing facilities in BC, 4 pulp mills in British Columbia. Three of the pulp mills are in Prince George and produce premium reinforcing northern softwood kraft (NSK) pulp. WymnWood mill in British Columbia is certified to SFI CoC and will be transitioning to PEFC CoC in 2020. Programme for the Endorsement of Forest Certification (PEFC) chain of custody certification (CoC) Solutions: Sawmill energy consumption and carbon emissions: 1) To track electrical energy consumption. 2) Use natural gas as an incremental heat source, rather than as a primary heat source in their kilns. 3) PULP MILL, BIOENERGY, BIOFUELPELLETS. Canfor has planted over a billion seedlings over 20 years, have high carbon sequestration properties | increasing kiln capacity at a number of operations, this causes an increase in energy consumption, specifically in natural gas and electricity.    | Grand Total t CO <sub>2</sub> e = 2118021<br>GHG emissions increased from 219 to 121 kilotonnes. Sawmills reduced GHG emissions for diesel, gasoline, propane and biomass, overall GHG emissions increased by three kilotonnes (+3%) in 2019 due to increased natural gas consumption | behavioural changes, automating specific processes, and capital projects that have been shown to reduce energy consumption and lower energy costs. Canfor Pulp participated in the new CleanBC Industrial Incentive Program (CIP), a Government of B.C.-led initiative that contributes to cleaner industrial operations across the province by reducing carbon tax costs for facilities that operate at or near world-leading emissions benchmarks. TCanfor continues to save 14,900 megawatt-hours of electricity annually, enough to power 1,400 homes each year | facilitates emission reductions using revenues from the carbon tax that industry pays above \$30 per tonne carbon dioxide equivalent. | 2019 Sustainability Report CANFOR AND CANFOR PULP                | <a href="https://www.canfor.com/docs/default-source/canfor-and-canfor-pulp-sustainability-report.pdf?sfvrsn=ecb893-1">https://www.canfor.com/docs/default-source/canfor-and-canfor-pulp-sustainability-report.pdf?sfvrsn=ecb893-1</a>                             |
| Canfor Pulp Ltd. Northwood Pulp Mill                                      | Enhanced - ECF Process-Chemical Pulp Mills. A sawmill energy modelling project was initiated that will ultimately have energy models developed for all of Canfor's B.C. sawmills in 2020, and will be able to account for the                                                                                | Product Description 550,000 admtyr Premium Bleached Softwood Kraft Pulp                                                                                                                                                                                                                                             | 100% of the fibre comes from non-controversial forests. 94% of the fibre is certified to sustainable forestry standards. Canfor Pulp has agreements in place with all our fibre suppliers to ensure that no protected or conservation areas are harvested. In addition, all of the harvested areas we source from have been assessed as low risk under the FSC Controlled Wood system.                                                                                                                                                                                                                                                                                                                                                                       | All fibre is harvested from sustainable forestry operations in the Prince George region.                                                           | Grand Total t CO <sub>2</sub> e = 1487902                                                                                                                                                                                                                                             | As described above (Canfor Pulp Ltd. - Prince George Pulp and Paper)                                                                                                                                                                                                                                                                                                                                                                                                                                                                                                | As described above (Canfor Pulp Ltd. - Prince George Pulp and Paper)                                                                  | Northwood Pulp Mill Environmental Product Declaration Sheet 2020 | <a href="https://www.canfor.com/docs/default-source/canfor-northwood-softwood-kraft-pulp-sustainability-report.pdf?sfvrsn=ecb893-1">https://www.canfor.com/docs/default-source/canfor-northwood-softwood-kraft-pulp-sustainability-report.pdf?sfvrsn=ecb893-1</a> |

# Supplementary material

| electricity, and Biomass                         |                                                                                                                                                                                                                                                                                                                                                                                                                                                                                                                                         |                                                                                                                                                                                                                                                                                                                                                                                             |                                                                                                                                                                                                                                                                                                                                                                                                                                                                                                                                                                                                                                                                                                                                                                                                                                                                                                                                                                                                        |            |                                           |                                       |           |                                        |                                                                                                                                                                                                                                                                                                                                                             |
|--------------------------------------------------|-----------------------------------------------------------------------------------------------------------------------------------------------------------------------------------------------------------------------------------------------------------------------------------------------------------------------------------------------------------------------------------------------------------------------------------------------------------------------------------------------------------------------------------------|---------------------------------------------------------------------------------------------------------------------------------------------------------------------------------------------------------------------------------------------------------------------------------------------------------------------------------------------------------------------------------------------|--------------------------------------------------------------------------------------------------------------------------------------------------------------------------------------------------------------------------------------------------------------------------------------------------------------------------------------------------------------------------------------------------------------------------------------------------------------------------------------------------------------------------------------------------------------------------------------------------------------------------------------------------------------------------------------------------------------------------------------------------------------------------------------------------------------------------------------------------------------------------------------------------------------------------------------------------------------------------------------------------------|------------|-------------------------------------------|---------------------------------------|-----------|----------------------------------------|-------------------------------------------------------------------------------------------------------------------------------------------------------------------------------------------------------------------------------------------------------------------------------------------------------------------------------------------------------------|
| Cariboo Pulp and Paper Company                   | Chemical Pulp Mills<br>Acquisition of Peace River, Cariboo JV interest and Santand in 2018 and Mercer Forestry Services in 2020<br>Ramp up of Friesau sawmill to capitalize on high return opportunities and alternative market capability<br>• Optimization of bio-extractives production                                                                                                                                                                                                                                              | <ul style="list-style-type: none"> <li>50% joint venture stake in reliable NBSK mill</li> <li>Reliable wood supply sourced from large local sawmilling industry</li> <li>Bio-mass fuelled cogeneration power plant with two turbines a 25 MW back pressure turbine to power pulp production and a 25 MW condensing turbine generator to generate electricity for sale to BCHydro</li> </ul> | Location: Quesnel, British Columbia (~650 km north of Vancouver)<br><ul style="list-style-type: none"> <li>Pulp production capacity: 170,000 tonnes per year NBSK</li> <li>Electricity generating capacity: 38.5 MW</li> <li>Certification: ISO 9001 and ISO 14001</li> <li>2020 green electricity sales: \$5.4 million</li> </ul>                                                                                                                                                                                                                                                                                                                                                                                                                                                                                                                                                                                                                                                                     | Commercial | Grand Total t CO <sub>2</sub> e ~ 128,850 | 170,000 tonnes NBSK<br>28.5 MW energy | Uncertain | Investor Presentation Report Feb. 2021 | <a href="https://www.woodfibre.com/responsibility/responsiblepaper-ghg/">https://www.woodfibre.com/responsibility/responsiblepaper-ghg/</a>                                                                                                                                                                                                                 |
| Catalyst Paper Corporation Powell River Division | West coast's largest specialty paper machines (2)<br><ul style="list-style-type: none"> <li>Deep-sea port facility with state-of-the-art power boiler and waste water treatment</li> <li>Printing packaging papers: 336,000 tonnes per year</li> <li>Coastal BC fibre supply dominated by sawmill residual chips and pulp logs</li> <li>Self-generated green power export to BC's grid</li> </ul>                                                                                                                                       | Mechanical Pulp Mills<br>The Paper Excellence Powell River mill is a leading producer of high quality newsprint and uncoated mechanical specialty papers.                                                                                                                                                                                                                                   | ISO 14001 environmental management system certified<br><ul style="list-style-type: none"> <li>93% of the mill's energy comes from renewable sources with 73% reduction in greenhouse gases since 1999</li> <li>13% of their power use is self-generated green electricity</li> <li>100% of their wood fibre is low risk using the FSC risk assessment process</li> <li>Certified to SFI Fibre Sourcing, FSC Controlled Wood, FSC®, PEFC™ and SFI® Chain of Custody</li> </ul>                                                                                                                                                                                                                                                                                                                                                                                                                                                                                                                          | Commercial | Grand Total t CO <sub>2</sub> e ~ 67,147  | under research                        | Less      | Fact Sheet 2020                        | <a href="https://paperscience.com/mill/location/powell-river/">https://paperscience.com/mill/location/powell-river/</a>                                                                                                                                                                                                                                     |
| Catalyst Paper Corporation Crofton Division      | Chemical Pulp Mills<br>Catalyst Crofton Mill today has two paper machines and two pulp lines. Paper Excellence's Catalyst Crofton Mill is a combined pulp and paper operation. Coastal BC fibre supply dominated by sawmill residual chips and pulp logs                                                                                                                                                                                                                                                                                | Its unique deep-sea port facility provides an economic gateway to major marketing in western North America, Asia and Latin America.                                                                                                                                                                                                                                                         | ISO 14001 environmental management system and ISO 9001 energy management system certified<br><ul style="list-style-type: none"> <li>89% of the mill's energy comes from renewable sources with 71% reduction in greenhouse gases since 1999</li> <li>21% of their power use is self-generated green electricity</li> <li>100% of their wood fibre is low risk using the FSC risk assessment process</li> <li>Certified to SFI Fibre Sourcing, FSC Controlled Wood, FSC®, PEFC™ and SFI® Chain of Custody standards.</li> </ul>                                                                                                                                                                                                                                                                                                                                                                                                                                                                         | Commercial | Grand Total t CO <sub>2</sub> e ~ 67,431  | under research                        | Uncertain | Fact Sheet 2020                        | <a href="https://paperscience.com/mill/location/crofton/">https://paperscience.com/mill/location/crofton/</a>                                                                                                                                                                                                                                               |
| Catalyst Paper Corporation Port Alberni Division | Newsprint Mills<br>Catalyst Port Alberni Mill was the first British Columbia mill to integrate residuals from sawmills, Directory and coated papers: 265,000 tonnes per year<br>• Coastal BC fibre supply dominated by sawmill residual chips and pulp logs                                                                                                                                                                                                                                                                             | West coast's largest coated paper machine and uncoated groundwood paper machine. State-of-the-art mechanical pulping, utility island and waste water treatment                                                                                                                                                                                                                              | ISO 14001 environmental management system certified<br><ul style="list-style-type: none"> <li>93% of the mill's energy comes from renewable sources with 83% reduction in greenhouse gases since 1999</li> <li>8% of their power use is self-generated green electricity</li> <li>100% of their wood fibre is low risk using the FSC risk assessment process</li> <li>Certified to SFI Fibre Sourcing, FSC®, PEFC™ and SFI® Chain of Custody standards</li> </ul>                                                                                                                                                                                                                                                                                                                                                                                                                                                                                                                                      | Commercial | Grand Total t CO <sub>2</sub> e ~ 43,774  | under research                        | Uncertain | Fact Sheet 2020                        | <a href="https://paperscience.com/mill/location/port-alberni/">https://paperscience.com/mill/location/port-alberni/</a>                                                                                                                                                                                                                                     |
| Skookumchuck Pulp Inc.                           | Chemical Pulp Mills<br>Skookumchuck Pulp has seen substantial modernization work making the mill one of Paper Excellence's most sophisticated facilities.                                                                                                                                                                                                                                                                                                                                                                               | The Paper Excellence Skookumchuck Pulp Mill Incorporated facility is a leading producer of high quality Northern Bleached Softwood Kraft pulps.                                                                                                                                                                                                                                             | 93% of the mill's energy comes from renewable sources with 69% reduction in greenhouse gases since 1999<br><ul style="list-style-type: none"> <li>77% of power use is self-generated green electricity</li> <li>100% of wood fibre is low risk using the FSC risk assessment process</li> <li>Certified to FSC® and PEFC™ Chain of Custody</li> </ul>                                                                                                                                                                                                                                                                                                                                                                                                                                                                                                                                                                                                                                                  | Commercial | Grand Total t CO <sub>2</sub> e ~ 98,342  | under research                        | Uncertain | Fact Sheet 2020                        | <a href="https://paperscience.com/wp-content/uploads/2020/10/Skookumchuck-Pulp.pdf">https://paperscience.com/wp-content/uploads/2020/10/Skookumchuck-Pulp.pdf</a>                                                                                                                                                                                           |
| Mackenzie Pulp Mill Corporation                  | Chemical Pulp Mills<br>The company says all gaseous, liquid and solid chemicals, and residues have been safely removed from the Mackenzie mill site                                                                                                                                                                                                                                                                                                                                                                                     | The company says all gaseous, liquid and solid chemicals, and residues have been safely removed from the Mackenzie mill site                                                                                                                                                                                                                                                                | The company says all gaseous, liquid and solid chemicals, and residues have been safely removed from the Mackenzie mill site<br><ul style="list-style-type: none"> <li>Paper Excellence Canada will be continuing operations at its pulp mill in Mackenzie. Mackenzie Pulp Mill Corporation is located in Mackenzie, BC, Canada and is part of the Industrial Equipment Wholesalers Industry. Mackenzie Pulp Mill Corporation has 290 total employees across all of its locations and generates \$121.33 million in sales (USD). (Sales figure is modelled). There are 45 companies in the Mackenzie Pulp Mill Corporation corporate family.</li> </ul>                                                                                                                                                                                                                                                                                                                                                | Commercial | Grand Total t CO <sub>2</sub> e ~ 65,570  | under research                        | Uncertain | Jun/20                                 | <a href="https://www.princenoseinspections.com/local-news/paper-excellence-closing-mackenzie-pulp-mill-37464/">https://www.princenoseinspections.com/local-news/paper-excellence-closing-mackenzie-pulp-mill-37464/</a>                                                                                                                                     |
| Mercer Celgar Limited Partnership                | Chemical Pulp Mills                                                                                                                                                                                                                                                                                                                                                                                                                                                                                                                     | Increased supply of spruce beetle damaged wood<br><ul style="list-style-type: none"> <li>Pine beetle and historic overcutting resulting in annual cut reductions across BC</li> <li>Recent forest fires in Canada</li> <li>Transportation bottlenecks</li> </ul>                                                                                                                            | Sustainable products for a carbon conscious planet. Solid wood products produced from sustainably sourced, certified, private and public land suppliers – Products used in construction and renovation and uses – Displacing higher carbon footprint concrete and steel alternatives<br><ul style="list-style-type: none"> <li>Pulp products produced from wood waste materials such as low quality forest wood and residuals from sawmills – End uses include bio-degradable tissue and packaging, as well as alternatives to plastic packaging. Electricity generated from the pulp chemical recovery process – Self-supply co-generated electricity and sell surplus – Green electricity capacity in displacing coal based electricity in most jurisdictions – Residual steam eliminates fossil fuel use Bio-based extractives produced from resins and natural oils of wood – Displacing hydrocarbon based products including floor additives, aroma therapy and fragrance applications</li> </ul> | Commercial | Grand Total t CO <sub>2</sub> e ~ 130,796 | under research                        | Uncertain | Investor Presentation Report Feb. 2021 | <a href="https://resources.worldeco.net/pdf/20_233-22/462-286.mr/fu/upload.com/wp-content/uploads/2023/03/2021-22-Raymond-James-Institutional-Investors-Final.pdf?time=61205364">https://resources.worldeco.net/pdf/20_233-22/462-286.mr/fu/upload.com/wp-content/uploads/2023/03/2021-22-Raymond-James-Institutional-Investors-Final.pdf?time=61205364</a> |
| Nanaimo Forest Products Ltd.                     | Chemical Pulp Mills                                                                                                                                                                                                                                                                                                                                                                                                                                                                                                                     | In 2019 Harmac Pacific installed a Chlorine Dioxide (ClO <sub>2</sub> ) liquid containment and vapor suppression system. This system is designed to contain and prevent any large release of Chlorine Dioxide that would impact the surrounding environment.                                                                                                                                | The Harmac mill produces high quality kraft pulps made from custom blends of Douglas fir, western hemlock, balsam fir, interior SPF and western red cedar. With its strategic location on a deep water port, the mill is well situated for cost effective export of pulp and receipt of raw materials such as wood fiber. Harmac Pacific's propane is supplied by Superior Propane. Superior Propane provides the storage vessels fueling systems. Maintenance and servicing of this equipment is also provided by Superior Propane's service technicians.                                                                                                                                                                                                                                                                                                                                                                                                                                             | Commercial | Grand Total t CO <sub>2</sub> e ~ 128,900 | under research                        | less      | The company website                    | <a href="https://www.harmacpacific.com/en/our-wood-pulps">https://www.harmacpacific.com/en/our-wood-pulps</a>                                                                                                                                                                                                                                               |
| Celgar Mill                                      | Chemical Pulp Mills<br>These projects have helped to make Celgar a leader in the global pulp industry. The mill produces approximately 500,000 tonnes of Northern Bleached Softwood Kraft pulp, enough eco-certified green energy to supply our own needs plus up to an additional 20,000 homes and 250,000 litres of turpentine annually, making it one of the main employers and economic generators for the region.<br><a href="https://mercerint.com/operations/mercer-celgar/">https://mercerint.com/operations/mercer-celgar/</a> | Project Blue Goose, 2007 – a \$24 million capital project improving operation efficiencies, increased production, and improved environmental performance.<br>In 2019, we improved production by debottlenecking the pulp packaging line, as well as built a turpentine extraction plant to generate sales and reduce chemical costs.                                                        | <ul style="list-style-type: none"> <li>Location: Castlegar, BC, Canada (~600 km east of Vancouver)</li> <li>Pulp production capacity: 520,000 tonnes per year NBSK</li> <li>Electricity generating capacity: 300 MW</li> <li>Certification: ISO 9001 and 14001</li> <li>2020 green electricity sales: \$10.9 million</li> <li>2020 bio-extractives sales: \$0.06 million</li> </ul> <p>Green Energy Project, 2010 – a \$61 million program that installed a second turbine generator to increase the installed generating capacity from 48 MW to 300 MW, as well as upgraded the bark boiler and steam facilities.</p>                                                                                                                                                                                                                                                                                                                                                                                 | Commercial | Grand Total t CO <sub>2</sub> e ~ 124,248 | 520,000 tonnes NBSK<br>300 MW energy  | less      | Investor Presentation Report Feb. 2021 | <a href="https://resources.worldeco.net/pdf/20_233-22/462-286.mr/fu/upload.com/wp-content/uploads/2023/03/2021-22-Raymond-James-Institutional-Investors-Final.pdf?time=61205364">https://resources.worldeco.net/pdf/20_233-22/462-286.mr/fu/upload.com/wp-content/uploads/2023/03/2021-22-Raymond-James-Institutional-Investors-Final.pdf?time=61205364</a> |

## Supplementary material

|             |                                                                                                                                                                                                                                                                      |                                                                                                                                                                                              |                                                                                                                                                                                                                                                                                                                                                                                            |            |                                                                               |                                                                                                                            |           |                                        |                                                                                                                                                                                                                                                                                                                               |
|-------------|----------------------------------------------------------------------------------------------------------------------------------------------------------------------------------------------------------------------------------------------------------------------|----------------------------------------------------------------------------------------------------------------------------------------------------------------------------------------------|--------------------------------------------------------------------------------------------------------------------------------------------------------------------------------------------------------------------------------------------------------------------------------------------------------------------------------------------------------------------------------------------|------------|-------------------------------------------------------------------------------|----------------------------------------------------------------------------------------------------------------------------|-----------|----------------------------------------|-------------------------------------------------------------------------------------------------------------------------------------------------------------------------------------------------------------------------------------------------------------------------------------------------------------------------------|
| Peace River | Harmac Pacific's propane is supplied by Superior Propane. Superior Propane provides the storage vessels, fueling systems. Maintenance and servicing of this equipment is also provided by Superior Propane's service technicians.                                    |                                                                                                                                                                                              | <ul style="list-style-type: none"> <li>• Growth in areas of core competence</li> <li>• Acquisition of Peace River, Cariboo JV interest and Santanol in 2018</li> <li>• Mercer Forestry Services in 2018</li> <li>• Ramp up of Fienau sawmill to capitalize on high-return opportunities and alternative market capability</li> <li>• Optimization of bio-extractives production</li> </ul> | Commercial | Grand Total t CO <sub>2</sub> e = 149583                                      | 475,000 tonnes NBSC/NBHK 30 MW energy                                                                                      | Uncertain | Investor Presentation Report Feb. 2021 | <a href="https://resources.senecore.net/pdf/33_333_23/462-286.myftpupload.com/wp-content/uploads/2021/03/2020-Report-Items-into-Forward-View.pdf#time=6.605594e4">https://resources.senecore.net/pdf/33_333_23/462-286.myftpupload.com/wp-content/uploads/2021/03/2020-Report-Items-into-Forward-View.pdf#time=6.605594e4</a> |
| West Fraser | <ul style="list-style-type: none"> <li>• 100% Timber supply chain certified</li> <li>• 61.4 Million native tree seedlings planted in 2019</li> <li>• 100% Harvest sites reforested</li> <li>• \$12.3 Million invested to improve forestry and stewardship</li> </ul> | West Fraser has invested in Low-Consistency Refining technology in our operations, reducing the electrical intensity in our BCTMP mills by 38% per ADMT (air-dried metric tonne) since 2005. | 75% Renewable energy, 13% Reduction of GHG emissions in 2019, 9.4 Million tonnes of CO <sub>2</sub> e stored in products, 99% of a log recovered for product, purpose or energy                                                                                                                                                                                                            | Commercial | 9.4 million CO <sub>2</sub> e stored in long-lived wood products made in 2019 | Electrical costs for mechanical pulping processes can make up as much as 35% of the manufacturing expenses for BCTMP pulp. | less      | West Fraser 2019 Responsibility Report | <a href="https://www.westfraser.com/sites/default/files/sustainability/West%20Fraser%2020%20Responsibility%20Report%20Summary.pdf">https://www.westfraser.com/sites/default/files/sustainability/West%20Fraser%2020%20Responsibility%20Report%20Summary.pdf</a>                                                               |

### S3 Aluminum sector in BC, including technology or process type and name, description & solutions, state of development, GHG impact, energy impact, Cost, and reference type with its reference link. (PICS's research project: Technological Innovation and Climate Policy Solutions to Achieve Net-Zero Emission by 2050 for EITE-Industries in BC and Canada)

| Industry                                                         | Technology or process type                                                                                                                                                                                                                                                                                                                                                                                                                                                                                                                            | Technology or process name                                                                                                                                                     | Description and Solutions                                                                                                                                                                                                                                                                                                                                                                                                                                                                                                                                             | State of development                                                                                               | GHG impact                              | Energy impact  | Cost                                                                                    | Reference type         | Reference links                                                                                                             |
|------------------------------------------------------------------|-------------------------------------------------------------------------------------------------------------------------------------------------------------------------------------------------------------------------------------------------------------------------------------------------------------------------------------------------------------------------------------------------------------------------------------------------------------------------------------------------------------------------------------------------------|--------------------------------------------------------------------------------------------------------------------------------------------------------------------------------|-----------------------------------------------------------------------------------------------------------------------------------------------------------------------------------------------------------------------------------------------------------------------------------------------------------------------------------------------------------------------------------------------------------------------------------------------------------------------------------------------------------------------------------------------------------------------|--------------------------------------------------------------------------------------------------------------------|-----------------------------------------|----------------|-----------------------------------------------------------------------------------------|------------------------|-----------------------------------------------------------------------------------------------------------------------------|
| Rio Tinto Alcan Inc. Mining located in Kitimat, British Columbia | Scope 3 goals are to: — Work in partnerships to develop breakthrough technology enabling the production of zero-carbon aluminium — Work in partnerships with customers on steel decarbonisation pathways and invest in technologies that could deliver reductions in steelmaking carbon intensity of at least 30% from 2030; — Work in partnerships to develop breakthrough technologies with potential to deliver carbon neutral steelmaking pathways by 2050 — Meet our ambition to reach net-zero emissions from shipping of our products by 2050. | ELYSIS joint-venture with Alcoa achieved production of commercial grade zero-carbon aluminium and completed the construction of the first industrial pilot facility in Canada. | With clean hydropower facility at Kemano and the Nechako Reservoir, the Kitimat smelter produces aluminium with one of the lowest carbon footprints in the world. Page 5.<br>Rio Tinto and Alcoa Corporation today announced a revolutionary process to make aluminium that produces oxygen and eliminates all direct greenhouse gas emissions from the traditional smelting process. ( <a href="https://www.riotinto.com/en/news/releases/first-carbon-free-aluminium-smelting">https://www.riotinto.com/en/news/releases/first-carbon-free-aluminium-smelting</a> ) | There are three main themes for the research that will be delivered through the C\$1.5 million funding from NSERC. | reducing the emissions intensity by 50% | under research | Since 2018, we have reduced Scope 1 and 2 emissions by 1.1M t CO <sub>2</sub> e, or 3%. | RI-Climate report 2020 | <a href="https://www.riotinto.com/sustainability/climate-change">https://www.riotinto.com/sustainability/climate-change</a> |

### S4 Mining sectors in BC, including technology or process type and name, description & solutions, state of development, GHG impact, energy impact, Cost, and reference type with its reference link. (PICS's research project: Technological Innovation and Climate Policy Solutions to Achieve Net-Zero Emission by 2050 for EITE-Industries in BC and Canada)

| Industry          | Technology or process type                            | Technology or process name                                                                                                                                                                                                                                                                                                     | Description and Solutions                                                                                                                                                                                                                                                                                                                                                                                        | State of development                                           | GHG impact                              | Energy impact                                                                                                                       | Cost                                                         | Reference type            | Reference links                                                                                                                                                                 |
|-------------------|-------------------------------------------------------|--------------------------------------------------------------------------------------------------------------------------------------------------------------------------------------------------------------------------------------------------------------------------------------------------------------------------------|------------------------------------------------------------------------------------------------------------------------------------------------------------------------------------------------------------------------------------------------------------------------------------------------------------------------------------------------------------------------------------------------------------------|----------------------------------------------------------------|-----------------------------------------|-------------------------------------------------------------------------------------------------------------------------------------|--------------------------------------------------------------|---------------------------|---------------------------------------------------------------------------------------------------------------------------------------------------------------------------------|
| Mining BC         |                                                       |                                                                                                                                                                                                                                                                                                                                | Coal mines emit Ventilation Air Methane (VAM) at concentrations of >2%. However these are significant source of emissions. This technology catalytically oxidises methane before carbonating and calculating in a fluidized bed. Essentially turning Methane into CO <sub>2</sub> and then capturing CO <sub>2</sub> .                                                                                           |                                                                |                                         | Energy used by the industry is estimated to be between 1.25% up to 11% of the world's total energy consumption, depending on source | Reduce the carbon intensity of our operations by 33% by 2030 | Forisight website- Report | <a href="https://forisight.com/wp-content/uploads/2020/07/Forisight_FuelSwitch_Review.pdf">https://forisight.com/wp-content/uploads/2020/07/Forisight_FuelSwitch_Review.pdf</a> |
| Teck Coal Limited | Bituminous Coal Mining-Elkview Operations             | Teck has a 95% partnership interest in Elkview. Production 9.0 million of clean coal. Proven and probable reserves at Elkview are projected to support mining for a further 30 years.                                                                                                                                          | using heat exchangers (by ethane combustion) to produce electricity. This results in a higher efficiency burning as well as turning a source of emissions into useful product.                                                                                                                                                                                                                                   | Commercial, little penetration of electric vehicles in mining  | Grand Total t CO <sub>2</sub> e =438448 | Uncertain                                                                                                                           | Reduce the carbon intensity of our operations by 33% by 2030 | Teck website              | <a href="https://www.teck.com/operations/canada/operations/elkview/">https://www.teck.com/operations/canada/operations/elkview/</a>                                             |
| Teck Coal Limited | Bituminous Coal Mining-Fording River Operations (FRC) | Targeting wash plant optimization in FRC—a key step in the steelmaking coal processing cycle—by creating an operator advisory tool that recommends ideal set points in the wash plant, based on an analysis of incoming material and historical data.                                                                          | Improving productivity and efficiency through cutting-edge technology including:<br>-Machine-learning predictive maintenance on mobile equipment<br>-Mining analytics to improve haul cycle times<br>-Processing improvements driven by artificial intelligence<br>-Connecting data systems to improve blast and shovel performance                                                                              | Commercial, little penetration of electric vehicles in mining  | Grand Total t CO <sub>2</sub> e =573128 | Uncertain                                                                                                                           | Reduce the carbon intensity of our operations by 33% by 2030 | Teck website              | <a href="https://www.teck.com/operations/canada/operations/foring-river/">https://www.teck.com/operations/canada/operations/foring-river/</a>                                   |
| Teck Coal Limited | Bituminous Coal Mining-Greenhills Operations          | the advanced sensing and analytics have also unlocked additional value, by identifying improvements to the thickener process, allowing the FRC wash plant to process additional coal from Greenhills Operations, thereby optimizing its processing capacity.                                                                   | Reduce the carbon intensity of our operations by 33% by 2030<br>Procure 50% of our electricity demands from clean energy by 2025 and 100% by 2030<br>Accelerate the adoption of zero-emissions alternatives for transportation by displacing the equivalent of 1,000 internal combustion engine (ICE) vehicles by 2025 - 50% lower carbon intensity at our Fort Hills mine compared to US refined barrels of oil | Commercial, little penetration of electric vehicles in mining  | Grand Total t CO <sub>2</sub> e =408459 | Uncertain                                                                                                                           | Reduce the carbon intensity of our operations by 33% by 2030 | Teck website              | <a href="https://www.teck.com/operations/canada/operations/greenhills/">https://www.teck.com/operations/canada/operations/greenhills/</a>                                       |
| Teck Coal Limited | Bituminous Coal Mining-Line Creek Operations          | Line Creek produces steelmaking coal – also called metallurgical coal or coking coal – which is used to make steel. Also, involves the shipment of the steelmaking coal from the mine site to bulk port terminals in Vancouver by rail. It is then loaded on to larger seagoing vessels, which carry it to our target markets. | Teck operates the Highland Valley Copper mine in British Columbia.                                                                                                                                                                                                                                                                                                                                               | Commercial, little penetration of electric equipment in mining | Grand Total t CO <sub>2</sub> e =216720 | Uncertain                                                                                                                           | Reduce the carbon intensity of our operations by 33% by 2030 | Teck website              | <a href="https://www.teck.com/operations/canada/operations/line-creek/">https://www.teck.com/operations/canada/operations/line-creek/</a>                                       |

**S5** Oil & Gas sectors in BC, including technology or process type and name, description & solutions, state of development, GHG impact, energy impact, Cost, and reference type with its reference link. (PICS's research project: Technological Innovation and Climate Policy Solutions to Achieve Net-Zero Emission by 2050 for EITE-Industries in BC and Canada)

4

## Supplementary material

### S6 Carbon capture technologies based in BC and Canada, including technology or process type and name, description & solutions, state of development, GHG impact, energy impact, cost, and reference type with its reference link. (PICS's research project: Technological Innovation and Climate Policy Solutions to Achieve Net-Zero Emission by 2050 for EITE-Industries in BC and Canada)

| Industry                              | Technology or process type                                                                                                                                                                                                                                                                                                                | Technology or process name                                                                                                                                                                                                                                                                     | Description and Solutions                                                                                                                                                                                                                                                                                                                                                                                                                                                                                                                          | State of development                                                                                                                                                           | GHG impact                                                                                                                                                                                                  | Energy impact                                                                                                                                                                         | Cost                                                                                                                                             | Reference type                                                                 | Reference links                                                                                                                                                                                                                                                                                                    |
|---------------------------------------|-------------------------------------------------------------------------------------------------------------------------------------------------------------------------------------------------------------------------------------------------------------------------------------------------------------------------------------------|------------------------------------------------------------------------------------------------------------------------------------------------------------------------------------------------------------------------------------------------------------------------------------------------|----------------------------------------------------------------------------------------------------------------------------------------------------------------------------------------------------------------------------------------------------------------------------------------------------------------------------------------------------------------------------------------------------------------------------------------------------------------------------------------------------------------------------------------------------|--------------------------------------------------------------------------------------------------------------------------------------------------------------------------------|-------------------------------------------------------------------------------------------------------------------------------------------------------------------------------------------------------------|---------------------------------------------------------------------------------------------------------------------------------------------------------------------------------------|--------------------------------------------------------------------------------------------------------------------------------------------------|--------------------------------------------------------------------------------|--------------------------------------------------------------------------------------------------------------------------------------------------------------------------------------------------------------------------------------------------------------------------------------------------------------------|
| CCS                                   | Existing/under development                                                                                                                                                                                                                                                                                                                | Existing/under development                                                                                                                                                                                                                                                                     | This needs to be explored for each branch of industry, e.g. cement, steel, aluminum, refineries and future bio-refineries                                                                                                                                                                                                                                                                                                                                                                                                                          | Parts are tested and proven but "systems" not, especially in an industrial setting                                                                                             | 5 to 99% capture, all depends on choice of capture technology and scope of capture                                                                                                                          | Increases heat demand for electricity demand (in case of dry process)                                                                                                                 |                                                                                                                                                  | UNDO Roadmap & peer reviewed article                                           | <a href="http://www.unido.org/en/our-work/051130/industrial-energy-efficiency/selected-projects/carbon-capture-and-storage-industrial-sector-roadmap.html">http://www.unido.org/en/our-work/051130/industrial-energy-efficiency/selected-projects/carbon-capture-and-storage-industrial-sector-roadmap.html</a>    |
| CCS                                   | Existing/under development                                                                                                                                                                                                                                                                                                                | Existing/under development                                                                                                                                                                                                                                                                     | Review article on                                                                                                                                                                                                                                                                                                                                                                                                                                                                                                                                  | Varying between R&D, pilot and commercial                                                                                                                                      | 5 to 99% capture, all depends on choice of capture technology and scope of capture                                                                                                                          | Increased energy demands for process                                                                                                                                                  | \$10-\$180/tonne CO2e avoided                                                                                                                    | Peer reviewed article                                                          | See Leeson, D., Fennell, P., Shah, N., Pettit, C. & Mac Dowell, N. A Techno-economic analysis and systematic review of carbon capture and storage (CCS) applied to the iron and steel, cement, oil refining and pulp and paper industries. International Journal of Greenhouse Gas Control in press, 71–84 (2017). |
| BECCS                                 | New process                                                                                                                                                                                                                                                                                                                               |                                                                                                                                                                                                                                                                                                | Capturing CO2 when producing e.g. future biofuels in e.g. a gasification process minimizes the incremental cost for the "capture" (as CO2 already in high concentration)                                                                                                                                                                                                                                                                                                                                                                           | Capture part no problem, success rests upon the gasification part                                                                                                              | negative emission (up to 50% of carbon flow)                                                                                                                                                                |                                                                                                                                                                                       |                                                                                                                                                  | Research report - peer reviewed                                                | <a href="http://portal.research.lu.se/portal/55952461449336505.pdf">http://portal.research.lu.se/portal/55952461449336505.pdf</a><br><a href="http://www.ecn.nl/docs/freem/reports/2004/041017.pdf">http://www.ecn.nl/docs/freem/reports/2004/041017.pdf</a>                                                       |
| Terra CO2                             | New Process                                                                                                                                                                                                                                                                                                                               | Geopolymer                                                                                                                                                                                                                                                                                     | Geopolymer concrete combines an alkaline liquid with a geological source material containing silicon and aluminum to form a binder that does not use any Portland cement. Because the chemical reaction that takes place is a polymerization process, the material is called a geopolymer.                                                                                                                                                                                                                                                         | the State of the Geopolymer Research & Development                                                                                                                             | Resulting in CO2 emission reduction up to 80% compared with Portland cement                                                                                                                                 | a reduction of 59% Energy needs in the manufacture of rock based geopolymer cement compared with Portland cement                                                                      |                                                                                                                                                  |                                                                                | <a href="http://www.geopolymer.org/wp-content/uploads/3-use-CO2-values.pdf">http://www.geopolymer.org/wp-content/uploads/3-use-CO2-values.pdf</a>                                                                                                                                                                  |
| CarbonCure Technologies               | Existing/under development                                                                                                                                                                                                                                                                                                                | The production of geopolymer superior to all methods since it represents a high reduction in cost (Amran et al., 2020) and energy consumption (Voneky et al., 2020), besides the added benefit of using industrial waste to develop a different building material (Trong, 2020).               | the mechanism of geopolymerization, including the controlling parameters and different raw materials (fly ash, kaolinite and metakaolin, slag, red mud, silica waste, heavy metals waste, and others) with particular focus on recent studies and challenges in this area. Developed a process for adding CO2 to ready-mix concrete in which the CO2 becomes converted into a mineral and sequestered to make a lighter, stronger and lower-carbon concrete. More than 100 concrete makers in the U.S., Canada and Malaysia are using the product. | Incorporating nanotechnology in the production of geopolymer through nano-sized additives will yield good impact in reducing the cost and enhancing the mechanical properties. | Reduction in CO2 emissions has been measured up to 0.73 ton CO2/ton of OPC replaced by geopolymer (Dai et al., 2013).                                                                                       | Geopolymer can replace OPC, and thus decreasing the energy consumption, reducing the cost of the building materials, and minimizing the environmental impacts of the cement industry. | Searching for new activators is mandatory for lowering the cost at the large scale production and the sustainability                             | Peer reviewed article: Recent progress in environmentally friendly geopolymers | N. Shetha, E.T. Sayed and M.A. Abdelkarem, Science of the Total Environment 762 (2021) 143366                                                                                                                                                                                                                      |
| Mining and Carbon reduction           | A UBC-based Tech. R&D                                                                                                                                                                                                                                                                                                                     | Carbon dioxide is removed from the gas before it exits the end of the pipe. The carbon is captured in the form of a solid mineral precipitate.                                                                                                                                                 | The carbon dioxide bearing bas is circulated through the pipeline containing reactive tailings. The Baptiste nickel deposit is ideal for a CO2 sequestration demonstration project. Prospects for CO2 mineralization and enhanced weathering of ultramafic mine tailings from the Baptiste nickel deposit in British Columbia.                                                                                                                                                                                                                     | BRIMM's Carbon Sequestration research project, led by BRIMM Director & UBC Prof. Greg Dipple                                                                                   | Direct air capture of CO2 would offset ~20% of a prospective mine's carbon emissions. Reaction of CO2-rich gases with tailings would offset ~50% of a mine's emissions.                                     | under research                                                                                                                                                                        | Potential savings would be \$10-\$15/Mt under a carbon price of \$10/t CO2 equivalent.                                                           | Peer reviewed article                                                          | <a href="https://www.sciencedirect.com/science/article/pii/S0959652621000811">https://www.sciencedirect.com/science/article/pii/S0959652621000811</a>                                                                                                                                                              |
| Low Carbon H2 production              |                                                                                                                                                                                                                                                                                                                                           |                                                                                                                                                                                                                                                                                                | The abundant natural gas resources could contribute to low-carbon hydrogen production if integrated with CCS facilities. The western Canadian sedimentary basins (WCSB)                                                                                                                                                                                                                                                                                                                                                                            |                                                                                                                                                                                |                                                                                                                                                                                                             | R&D                                                                                                                                                                                   |                                                                                                                                                  | Peer reviewed article                                                          | <a href="https://documentcloud.adobe.com/link/review?uri=urn:aad:scds:US:FS5ca97f_9Bcc-4468-b64e-8609a6c901c1#pageNum=1">https://documentcloud.adobe.com/link/review?uri=urn:aad:scds:US:FS5ca97f_9Bcc-4468-b64e-8609a6c901c1#pageNum=1</a>                                                                        |
| Carbon dioxide disposal               | A permanent method of CO2 disposal based on combining CO2 chemically with abundant raw materials to form stable carbonate minerals. Preliminary investigations have been conducted on two types of processes, involving either direct carbonation of minerals at high temperature or processing in aqueous solution.                      | CO2 disposal in carbonate minerals                                                                                                                                                                                                                                                             | CCU has certain disadvantages: the requirement of high energy consumption processes such as mineral carbonation plus stable metal sources are required to fix CO2. In this work: concentrated seawater to supply metal ions. Plus, the selected 5 wt % amine solution changed CO2 into aqueous CO2 to reduce the additional energy required to form the metal carbonate under moderate conditions. As a result, precipitates were formed because of the reaction of carbonate radicals with metal ions in the seawater.                            | Varying between R&D, pilot and commercial                                                                                                                                      | Zero                                                                                                                                                                                                        | reduced in energy impact vs. CCU                                                                                                                                                      | uncertain                                                                                                                                        | Peer reviewed article                                                          | <a href="https://dx.doi.org/10.3390/jerph18010120">https://dx.doi.org/10.3390/jerph18010120</a>                                                                                                                                                                                                                    |
| Canada three large-scale CCS projects | CCS offers a proven technology to reduce greenhouse gas emissions (GHE) in this hard to abate sector.                                                                                                                                                                                                                                     | Post combustion flue gas is remarkably similar in cement or coal thermal plants and CCS lessons learned can be readily adapted and transferred across the industries.                                                                                                                          | 1. SaskPower's CCS facility at the Boundary Dam Power Station near Estherville, Sask.<br>2. the Weyburn-Midale enhanced oil recovery projects operated by Cenovus Energy and Apache Canada<br>3. the Shell Quest project at the Scotford oil sands upgrader near Edmonton.                                                                                                                                                                                                                                                                         | in commercial operation                                                                                                                                                        | Canada's renewed target aims to reduce emissions by 40 to 45 per cent below 2005 levels by the year 2030.                                                                                                   | it would cost about 30 per cent less.                                                                                                                                                 | A second-generation 803 - type project at double the size is projected to have costs 67 per cent lower per tonne of captured CO2 than the first. | Report by Beth (Hardy) Vallaho   Opinion   April 29th 2021                     | <a href="https://www.nationalobserver.com/2021/04/29/opinion/canada-must-go-big-carbon-capture-climate-goals">https://www.nationalobserver.com/2021/04/29/opinion/canada-must-go-big-carbon-capture-climate-goals</a>                                                                                              |
| Carbon Capture-Next wave              | Metal-organic frameworks (MOF). Chemically processing the fuel before it enters the power plant can turn it into CO2 and hydrogen. After the MOF captures the CO2, the hydrogen is burned, and the only byproduct is water. This extra chemical processing step would need to be built into new power plants as a pre-combustion process. | a class of highly absorbent, nanoporous materials called metal-organic frameworks (MOFs) have emerged as a promising material for carbon capture in power plants.                                                                                                                              | Snurr and his group have discovered a way to rapidly identify top candidates for carbon capture—using just one per cent of the computational effort that was previously required. By applying a genetic algorithm, they rapidly searched through a database of 55,000 MOFs.                                                                                                                                                                                                                                                                        | R&D. Top candidate: a variant of NOT-101, has a higher capacity for CO2 than any MOF reported in scientific literature for the relevant conditions.                            | 10–15 per cent of power plant exhaust is CO2; the rest is mainly nitrogen and water vapor. Snurr and his team have designed a MOF that can sort these gases to capture CO2 before it enters the atmosphere. | under research                                                                                                                                                                        | uncertain                                                                                                                                        | Peer reviewed article, 2021                                                    | <a href="https://doi.org/10.1007/s10450-021-00314-z">https://doi.org/10.1007/s10450-021-00314-z</a>                                                                                                                                                                                                                |
| Carbon Capture-Next wave              | Nanosponges                                                                                                                                                                                                                                                                                                                               | consists of a silica scaffold, the sorbent support, with nanoscale pores for maximum surface area. They dip the scaffold into liquid amine, which soaks into the support like a sponge and partially hardens. The finished product is a stable, dry white powder that captures CO2 even in the | Emanuel Guannelis (Cornell University materials scientist) have invented low-toxicity, highly effective carbon-trapping "sponges" that could improve carbon capture economics, that performs as well as or better than industry benchmarks for carbon capture.                                                                                                                                                                                                                                                                                     | R&D                                                                                                                                                                            | uncertain                                                                                                                                                                                                   | R&D                                                                                                                                                                                   | under research                                                                                                                                   | website                                                                        | <a href="https://www.engineering.cornell.edu/files/ny-director/emmanuel-guannelis">https://www.engineering.cornell.edu/files/ny-director/emmanuel-guannelis</a>                                                                                                                                                    |

# Supplementary material

|                             |                                                                                                                                                                                                                                  |                                                                                                                                                                                                                                                                                                                                           |                                                                                                                                                                                                                                                                                                                                                                                                                                                                                                                                                                                                                                                                                                                                                                                                                                                                                                                                                                                                                                               |                                                                                                                                                                                                                                                                                        |                                                                                                                                                                                                                                                                                  |                                                                                                                                                                                                                                         |                                                                                    |                                                                                                                 |                                                                                                                                                                                                 |
|-----------------------------|----------------------------------------------------------------------------------------------------------------------------------------------------------------------------------------------------------------------------------|-------------------------------------------------------------------------------------------------------------------------------------------------------------------------------------------------------------------------------------------------------------------------------------------------------------------------------------------|-----------------------------------------------------------------------------------------------------------------------------------------------------------------------------------------------------------------------------------------------------------------------------------------------------------------------------------------------------------------------------------------------------------------------------------------------------------------------------------------------------------------------------------------------------------------------------------------------------------------------------------------------------------------------------------------------------------------------------------------------------------------------------------------------------------------------------------------------------------------------------------------------------------------------------------------------------------------------------------------------------------------------------------------------|----------------------------------------------------------------------------------------------------------------------------------------------------------------------------------------------------------------------------------------------------------------------------------------|----------------------------------------------------------------------------------------------------------------------------------------------------------------------------------------------------------------------------------------------------------------------------------|-----------------------------------------------------------------------------------------------------------------------------------------------------------------------------------------------------------------------------------------|------------------------------------------------------------------------------------|-----------------------------------------------------------------------------------------------------------------|-------------------------------------------------------------------------------------------------------------------------------------------------------------------------------------------------|
|                             |                                                                                                                                                                                                                                  | presence of moisture.                                                                                                                                                                                                                                                                                                                     |                                                                                                                                                                                                                                                                                                                                                                                                                                                                                                                                                                                                                                                                                                                                                                                                                                                                                                                                                                                                                                               |                                                                                                                                                                                                                                                                                        |                                                                                                                                                                                                                                                                                  |                                                                                                                                                                                                                                         |                                                                                    |                                                                                                                 |                                                                                                                                                                                                 |
| Carbon Capture-Next wave    | NH <sub>2</sub> -MIL-101(A) metal-organic frameworks (MOFs) for CO <sub>2</sub> separation.                                                                                                                                      | Notably, the membrane containing 10 wt % 5-MIL-5 (NH <sub>2</sub> -MIL-101(A)) functionalized with 5.0 mL of APFES) showed an increment in CO <sub>2</sub> permeability (50%), and ideal CO <sub>2</sub> /CH <sub>4</sub> selectivity (80%) compared to the PES membrane                                                                  | NH <sub>2</sub> -MIL-101(A) metal-organic frameworks (MOFs) covered with 3-aminopropyltriethoxysilane (APTES) were incorporated into the polyethersulfone (PES) to produce mixed-matrix membranes (MMMs) for CO <sub>2</sub> separation, developed at (University of British Columbia, Kelowna) for the first time, the ability to engineer dual transport pathways in MOF hybrid membranes by achieving very high loadings of MOF (50 wt%), which result in an 8-fold improvement in CO <sub>2</sub> permeability from the pure polymer.                                                                                                                                                                                                                                                                                                                                                                                                                                                                                                     | R&D                                                                                                                                                                                                                                                                                    | net carbon negative                                                                                                                                                                                                                                                              |                                                                                                                                                                                                                                         | Peer reviewed article, 2021                                                        | <a href="https://doi.org/10.1016/j.cherd.2021.09.014">https://doi.org/10.1016/j.cherd.2021.09.014</a>           |                                                                                                                                                                                                 |
| Carbon Capture-Next wave    | Crystals                                                                                                                                                                                                                         | a design of MOF at mesoporous SiO <sub>2</sub> yolk-shell nanostructure via a mesoporous silica coating followed by selective water etching strategy. Different from conventional alkali- or acid etching methods, water etching of MOF surface presents a green and cost-effective way to form yolk-shell structures.                    | created crystals that capture CO <sub>2</sub> much more efficiently than previously known materials, even in the presence of water. So far, this has been difficult since the presence of water prevents the adsorption of CO <sub>2</sub> . Complete dehydration is a costly process. Scientists have now created a stable and recyclable material where the micro-pores within the crystal have different adsorption sites for CO <sub>2</sub> and water.                                                                                                                                                                                                                                                                                                                                                                                                                                                                                                                                                                                   | R&D                                                                                                                                                                                                                                                                                    | uncertain                                                                                                                                                                                                                                                                        | under research                                                                                                                                                                                                                          | under research                                                                     | Peer reviewed article, 2020                                                                                     | <a href="https://doi.org/10.1016/j.mem.2020.06.041">https://doi.org/10.1016/j.mem.2020.06.041</a>                                                                                               |
| Carbon Capture-Next wave    | Turning carbon to rock                                                                                                                                                                                                           | the first time that CO <sub>2</sub> can be permanently and rapidly locked away from the atmosphere by injecting it into volcanic bedrock. The CO <sub>2</sub> reacts with the surrounding rock, forming environmentally benign minerals.                                                                                                  | led by Columbia University, the University of Iceland, the University of Toulouse and Reykjavik Energy—has demonstrated that it can take as little as two years. CCS is currently happening at Reykjavik Energy's Helluhell geothermal power plant                                                                                                                                                                                                                                                                                                                                                                                                                                                                                                                                                                                                                                                                                                                                                                                            | R&D: next step for CarbiX is to upscale CO <sub>2</sub> storage in basalt: the CarbiX project, a European Commission— and Department of Energy-funded program to develop ways to store anthropogenic CO <sub>2</sub> in basaltic rocks through field, laboratory and modeling studies. | between 95 and 98 per cent of the injected CO <sub>2</sub> was mineralized over the period of less than two years, which is amazingly fast: up to 5,000 tonnes of CO <sub>2</sub> per year are captured and stored in a basaltic reservoir.                                      |                                                                                                                                                                                                                                         | Peer reviewed article, 2020                                                        | <a href="https://doi.org/10.1016/j.fuel.2020.117900">https://doi.org/10.1016/j.fuel.2020.117900</a>             |                                                                                                                                                                                                 |
| Carbon Capture-Next wave    | Turning carbon into fuel                                                                                                                                                                                                         | bubbled air through an aqueous solution of pentaerythritolamine, adding a catalyst to encourage hydrogen to latch onto the CO <sub>2</sub> under pressure. They then heated the solution, converting 79 per cent of the CO <sub>2</sub> into methanol. Though mixed with water, the resulting methanol can be easily distilled.           | Previous efforts have required a slower multistage process with the use of high temperatures and high concentrations of CO <sub>2</sub> , meaning that renewable energy sources would not be able to efficiently power the process.<br><br>The new system operates at around 125–165 degrees Celsius, minimizing the decomposition of the catalyst, which occurs at 155 degrees Celsius. It also uses a homogeneous catalyst, making it a quicker "one-pot" process.                                                                                                                                                                                                                                                                                                                                                                                                                                                                                                                                                                          | the process to the point that it could be scaled up for industrial use, though that may be five to 10 years away.                                                                                                                                                                      |                                                                                                                                                                                                                                                                                  | under research                                                                                                                                                                                                                          | uncertain                                                                          | Patent                                                                                                          | Conversion of carbon dioxide to methanol and/or dimethyl ether using bi-reforming of methane or natural gas, G. A. Olah and G. K. S. Prakash, U.S. Patent, 7,909,559, March 15, 2011, 2010-2011 |
| Carbon Capture-Next wave    | Turning carbon into fibres                                                                                                                                                                                                       | Electrolytic production of iron in molten salts by splitting iron oxide into iron metal and O <sub>2</sub> is a low-carbon footprint alternative to the massive CO <sub>2</sub> emissions associated with conventional carbothermal iron production and permits.                                                                          | developed a technology to economically convert atmospheric CO <sub>2</sub> directly into highly valued carbon nanofibers for industrial and consumer products, such as those used in the Boeing 787 Dreamliner, as well as in high-end sports equipment, wind turbine blades and a host of other products. It advances a CO <sub>2</sub> -free method for iron production, by modifying iron electrosynthesis in molten Li <sub>2</sub> CO <sub>3</sub> to control iron product particle size and by decreasing the electrolyte extracted with the pure iron product.                                                                                                                                                                                                                                                                                                                                                                                                                                                                         | scaling up quickly and soon should be in range of making tonnes of kilograms of nanofibers an hour.                                                                                                                                                                                    | electrical energy costs of this "solar thermal electrochemical process" to be around \$1,000/ton of carbon nanofiber product, which means the cost of running the system is hundreds of times less than the value of product output.                                             | under research                                                                                                                                                                                                                          | Peer reviewed article, 2021                                                        | <a href="https://doi.org/10.1016/j.seppur.2020.117218">https://doi.org/10.1016/j.seppur.2020.117218</a>         |                                                                                                                                                                                                 |
| Svante                      | our technology captures carbon dioxide from flue gas, concentrates it, then releases it for safe storage or industrial use, all in 60 seconds.                                                                                   | using tailor-made nano-materials (solid adsorbents) with very high storage capacity for carbon dioxide. A sugar-cube sized quantity of our material has the surface area of a football field. We have engineered these adsorbents to catch and release CO <sub>2</sub> in less than 60 seconds, compared to hours for other technologies. | capture CO <sub>2</sub> directly from industrial sources at less than half the capital cost of existing solutions, Svante makes commercial-scale carbon capture reality, and positions global industries to play offense in the fight against climate change.                                                                                                                                                                                                                                                                                                                                                                                                                                                                                                                                                                                                                                                                                                                                                                                 | market-ready and commercial-scale solutions. Follow a manual add-on link<br>Pilot Plant 30 tpd, Lloydminster, SK, Canada. And LafargeHolcim Cement Pilot Plant 1 tpd Richmond, BC, Canada                                                                                              | 400 Model – Pilot Plant 30 tonne per day (TPD) 1500 Model – Commercial Plant 500 1,000 TPD 100 Model – Lab Testing Units 100 kg per day 200 Model – Field Testing Units 500 - 1,000 kg per day                                                                                   | A new class of materials such as functionalized silica or metal-organic frameworks exhibit far sharper temperature and pressure swing absorption and desorption, which allow for lower parasitic energy loads and faster kinetic rates. | website                                                                            | <a href="https://svanteinc.com/carbon-capture-technology/">https://svanteinc.com/carbon-capture-technology/</a> |                                                                                                                                                                                                 |
| Carbon Upcycling Tech (CUT) | The reactors are pressurized with CO <sub>2</sub> from point source emissions. Then the material is treated through our patented Mechanically Assisted Chemical Exfoliation (MACE) process                                       | We treat readily available powder feedstocks such as Fly Ash, crushed glass, steel slag, graphite, talc, and more                                                                                                                                                                                                                         | End Product: A suite of CO <sub>2</sub> enhanced additives that are used in concrete, anti-corrosion coatings, plastics, consumer products, and more                                                                                                                                                                                                                                                                                                                                                                                                                                                                                                                                                                                                                                                                                                                                                                                                                                                                                          | scaling up - Eta: 20 tonne capacity                                                                                                                                                                                                                                                    | Compared to a conventional coating, CUT's anti-corrosion coating has a 87.5% lower carbon footprint. CUT's polymer additive can be incorporated into many types of polymers as a nucleator or filler but in Polyethylene, this additive results in a 90% lower carbon footprint. | CUT's technology is a low energy carbon utilization process which operates in batches so production is targeted at non-peak electricity hours.                                                                                          | <a href="#">New technologies are protecting a slice of the 30 gigatonne of CO2</a> | website                                                                                                         | <a href="https://carbonupcycling.com/technology">https://carbonupcycling.com/technology</a>                                                                                                     |
| Suncor Energy Inc.          | At Suncor, we extract, produce and provide energy from a mix of sources, ranging from oil sands to wind and renewable fuels.                                                                                                     | Carbon Capture                                                                                                                                                                                                                                                                                                                            | As Canada's leading integrated energy company, we embrace our role in shaping our shared and sustainable energy future and know that together we need to look beyond the energy needs of today and understand what is required for the future. Suncor pioneered oil sands development. Our early investments in technology helped unlock the potential of the oil sands by improving reliability and performance, expanding productivity and driving down costs while reducing our environmental footprint.                                                                                                                                                                                                                                                                                                                                                                                                                                                                                                                                   | scale-up                                                                                                                                                                                                                                                                               | the GHG intensity of cogeneration power is approximately 75 per cent lower than coal-fired power generation                                                                                                                                                                      | R&D                                                                                                                                                                                                                                     | under research                                                                     | <a href="https://www.suncor.com">https://www.suncor.com</a>                                                     |                                                                                                                                                                                                 |
| CleanO2                     | Calgary-based CleanO2 developed CARBIN-X, a small-scale carbon-capture device for home furnaces that captures CO <sub>2</sub> in the form of carbonate, which can then be used to make a range of products, including hand soap. | Carbon Capture                                                                                                                                                                                                                                                                                                                            | "Environmentally friendly soap made with captured carbon. Every CleanO2 soap product is made with carbon that would otherwise have been released into the atmosphere if not captured by our CARBIN-X™ units and turned into amazing soap products that are great for your body, the community, and the environment. When you purchase CleanO2 soap products, you're supporting the deployment of more CARBIN-X™ units around the world to capture more carbon and reduce the impact on our climate.                                                                                                                                                                                                                                                                                                                                                                                                                                                                                                                                           | under research                                                                                                                                                                                                                                                                         |                                                                                                                                                                                                                                                                                  | under research                                                                                                                                                                                                                          | uncertain                                                                          | website                                                                                                         | <a href="https://www.cleano2.ca/">https://www.cleano2.ca/</a>                                                                                                                                   |
| CO2 Solutions Inc.          | EXCLUSIVE PROPRIETARY HIGH-PERFORMANCE ENZYME: CO <sub>2</sub> Solutions' innovative carbon-capture technology stands out through its ingenious use of the carbonic anhydrase (CA) enzyme.                                       | Carbon Capture                                                                                                                                                                                                                                                                                                                            | CO <sub>2</sub> Solutions Inc. developed an alternative to existing liquid amine carbon capture that produces no toxic waste. (Amine-based water-leach solvents are considered to be promising energy-saving alternatives to existing aqueous amine solvents for CO <sub>2</sub> capture ( <a href="https://doi.org/10.1016/j.jpcp.2020.125744">https://doi.org/10.1016/j.jpcp.2020.125744</a> )) The company has partnered with Resolute Forest Products to build a 30-tonne-per-day carbon-capture plant at the company's pulp mill in Saint-Felicien, with the CO <sub>2</sub> to be used in the Tondra Greenhouse complex. CO <sub>2</sub> Solutions' innovative carbon-capture technology stands out through its ingenious use of the carbonic anhydrase (CA) enzyme. Naturally present in humans and all living organisms, CA is vital to the organic exchange of CO <sub>2</sub> during respiration. In fact, it was in 2014 when CO <sub>2</sub> Solutions presented their high-performance industrial version of carbonic anhydrase. | Its commercial St-Felicien 30 tpd capture unit                                                                                                                                                                                                                                         | 2500 hours in order to capture ten tonnes of CO <sub>2</sub> /day                                                                                                                                                                                                                | under research                                                                                                                                                                                                                          | under research                                                                     | website                                                                                                         | <a href="https://co2solutions.com/en/industry/">https://co2solutions.com/en/industry/</a>                                                                                                       |

## Supplementary material

|                             |                                                                                                                                                                                                                                                                                                                                     |                               |                                                                                                                                                                                                                                                                                                                                                                                                                                                                                                                                                                                                                                                                                                                                                                                                                                            |                                                                                                                                |                                                                                                                                                                                                                                                                                                                              |                                                                                                                              |                             |         |                                                                                                               |
|-----------------------------|-------------------------------------------------------------------------------------------------------------------------------------------------------------------------------------------------------------------------------------------------------------------------------------------------------------------------------------|-------------------------------|--------------------------------------------------------------------------------------------------------------------------------------------------------------------------------------------------------------------------------------------------------------------------------------------------------------------------------------------------------------------------------------------------------------------------------------------------------------------------------------------------------------------------------------------------------------------------------------------------------------------------------------------------------------------------------------------------------------------------------------------------------------------------------------------------------------------------------------------|--------------------------------------------------------------------------------------------------------------------------------|------------------------------------------------------------------------------------------------------------------------------------------------------------------------------------------------------------------------------------------------------------------------------------------------------------------------------|------------------------------------------------------------------------------------------------------------------------------|-----------------------------|---------|---------------------------------------------------------------------------------------------------------------|
| Pond Technology             | the world's first commercial installation to capture and convert industrial emissions into valuable nutraceutical end-products.                                                                                                                                                                                                     | Carbon Capture                | Developed a process for taking untreated emissions from power plants, refineries or cement plants and uses it to grow algae in bioreactors, sequestering the carbon and cleaning up other impurities from the exhaust. The algae is then used to make animal feed, cosmetics and biofuels. January 2018, Pond became a publicly-listed company, and in October 2018 broke ground on its first commercial-scale facility at Markham District Energy.                                                                                                                                                                                                                                                                                                                                                                                        | the world's first commercial installation to capture and convert industrial emissions into valuable nutraceutical end-products |                                                                                                                                                                                                                                                                                                                              | under research                                                                                                               | uncertain                   | website | <a href="https://www.pondtech.com/companies/">https://www.pondtech.com/companies/</a>                         |
| C2CNT                       | Carbon Corp's C2CNT Genesis Device™ is a proprietary, revolutionary, new chemistry and technology introduced in 2015. In a manner similar to which aluminum metal is produced from aluminum oxide ore, by a process called electrolysis, Carbon Corp transforms Carbon Dioxide into valuable carbon nano materials by electrolysis. | Carbon Capture                | The C2CNT's technology is delineated in our peer-reviewed technical publications and described in international media including the descriptions in the BBC, Forbes and Science. Carbon Corp uniquely directly removes and eliminates the greenhouse gas carbon dioxide from the atmosphere or from power plants, industrial processes, transportation and CO2 domestic sources. Instead of emitting carbon dioxide, Carbon Corp ingeniously produces carbon nanotubes (CNTs), carbon nano-onions (CNOs), or graphene, or ultra-strong carbon structural materials. With Carbon Corp, CO2 is intercepted directly from the atmosphere, or from flue stacks, without the need to concentrate the CO2, and split by electrolysis into O2 at the anode and into high value CNTs, formed by transition metal nucleation sites, at the cathode. | R&D                                                                                                                            | Carbon Corp, who relocated from the USA to Calgary, transforms CO2 into carbon nanotubes, with applications such as lightweight, ultra-strong and cost effective replacements for metals, stronger cement composite building materials, and expanding applications in industrial catalysis, batteries, and nano-electronics. | under research                                                                                                               | uncertain                   | website | <a href="https://www.c2cnt.com">https://www.c2cnt.com</a>                                                     |
| SeeO2 Energy                | SeeO2 Energy converts CO2 emissions into high value fuels and chemicals in a net negative carbon process.                                                                                                                                                                                                                           | Carbon Conversion and Storage | This net negative carbon process can be used in green plastics, chemical and metal processing industries.                                                                                                                                                                                                                                                                                                                                                                                                                                                                                                                                                                                                                                                                                                                                  | under research                                                                                                                 | net carbon negative                                                                                                                                                                                                                                                                                                          | under research                                                                                                               |                             | website | <a href="https://www.seeo2energy.com/">https://www.seeo2energy.com/</a>                                       |
| Carbon Cap Inc.             | The world's first industrial carbon recycling system.                                                                                                                                                                                                                                                                               | Carbon Capture                | Our patented TANDEM CARBON RECYCLING SYSTEM is housed in a modular, containerized drop-in unit, designed to capture and convert stack emissions directly at the source. Our proprietary process is net carbon negative, efficiently utilizing high volumes of heavy industry emissions – produced by power generation or other industrial processes such as cement and manufacturing – to create valuable materials and revenue streams.                                                                                                                                                                                                                                                                                                                                                                                                   | under research                                                                                                                 | net carbon negative                                                                                                                                                                                                                                                                                                          | under research                                                                                                               | under research              | website | <a href="https://www.sdr.ca/en/companies/carbon-cap-inc/">https://www.sdr.ca/en/companies/carbon-cap-inc/</a> |
| Hyperion Global Energy Inc. | All-in-One Capture + Conversion Drop-In System. INDUSTRIAL CARBON RECYCLING                                                                                                                                                                                                                                                         | Carbon Capture & Conversion   | an Ottawa-based technology. Our patented TANDEM CARBON RECYCLING SYSTEM is housed in a modular, containerized drop-in unit, designed to capture and convert stack emissions directly at the source. Our proprietary process is net carbon negative, efficiently utilizing high volumes of heavy industry emissions – produced by power generation or other industrial processes such as cement and manufacturing – to create valuable materials and revenue streams.                                                                                                                                                                                                                                                                                                                                                                       | scale-up                                                                                                                       | IMPACT: UP TO 99% CO2 MITIGATED AT SOURCE.                                                                                                                                                                                                                                                                                   | under research                                                                                                               | under research              | website | <a href="https://hyperionenergy.ca">https://hyperionenergy.ca</a>                                             |
| CarbiCrete                  | With CarbiCrete, cement is replaced with steel slag, which is mixed with the other materials using standard equipment. The mix is then poured into a conventional block-making machine where the CMUs are formed.                                                                                                                   | Carbon Capture and cure       | CarbiCrete is a Montreal-based carbon removal technology company that is developing innovative, low-cost building solutions that contribute to the reduction of greenhouse gas emissions. CarbiCrete develops CO2 mineralization systems that injects carbon dioxide into concrete for the construction industry. In order to cure the concrete, it must be placed into a specialized absorption chamber into which CO2 is injected. Within 24 hours, the concrete has reached full strength.                                                                                                                                                                                                                                                                                                                                              | scale-up                                                                                                                       | 8kg CO2 abated/removed per CMU.<br>350,000 Kg of CO2 permanently embedded in CMUs<br>1,000,000 Kg of CO2 emissions avoided                                                                                                                                                                                                   | higher compressive strength by up to 30% and display better freeze/thaw resistance.<br>Up to 30% Better compressive strength | 10-20% Lower material costs | website | <a href="https://carbicrete.com">https://carbicrete.com</a>                                                   |

## Supplementary material

**S7** Cutting-edge innovative technologies within the hydrogen value chain from a) R&D Lab's universities in Vancouver and Victoria. (PICS's research project: Technological Innovation and Climate Policy Solutions to Achieve Net-Zero Emission by 2050 for EITE-Industries in BC and Canada) and b) Cleantech-based Companies. See profiles in the appendix for more details on these companies <sup>1</sup>

a)

| Technology Developers                                                                                                                                                                                                                                                                                                                                                                                   | Transportation & Distribution                                                                                                                                                                                                                                                                                                                                                     | Utilities                                                                                                                                                                                                                                                                                                                                       | End-use Applications                                                                                                                                                                                                                                                                                                                  |
|---------------------------------------------------------------------------------------------------------------------------------------------------------------------------------------------------------------------------------------------------------------------------------------------------------------------------------------------------------------------------------------------------------|-----------------------------------------------------------------------------------------------------------------------------------------------------------------------------------------------------------------------------------------------------------------------------------------------------------------------------------------------------------------------------------|-------------------------------------------------------------------------------------------------------------------------------------------------------------------------------------------------------------------------------------------------------------------------------------------------------------------------------------------------|---------------------------------------------------------------------------------------------------------------------------------------------------------------------------------------------------------------------------------------------------------------------------------------------------------------------------------------|
| <ul style="list-style-type: none"> <li>S. Holdcroft<sup>2</sup></li> <li>W. Merida<sup>3</sup></li> <li>B. Gates<sup>2</sup></li> <li>E. Kjeang<sup>2</sup></li> <li>P. Palmer</li> <li>D. P. Wilkinson<sup>3</sup></li> <li>D. Harrington<sup>4</sup></li> <li>K. Smith</li> <li>M. MacLachlan</li> <li>C. Berlinguette<sup>3</sup></li> <li>J. Zhang</li> <li>A. Rowe</li> <li>J. R. Grace</li> </ul> | <ul style="list-style-type: none"> <li>N. Branda <sup>2</sup></li> <li>K. Oldknow<sup>2</sup></li> <li>G. McTaggart-Cowan</li> <li>M. Bahrami</li> <li>F. Golnaraghi <sup>2</sup></li> <li>P. Julia</li> <li>N. Djilali</li> <li>L. Li</li> <li>G. Lovegrove</li> <li>J. R. Marti</li> <li>J. Saddler<sup>3</sup></li> <li>P. Servati <sup>3</sup></li> <li>H. Trajano</li> </ul> | <ul style="list-style-type: none"> <li>M. Moallem</li> <li>M. Adachi<sup>2</sup></li> <li>J. Wang</li> <li>K. Kavanagh</li> <li>M. Ordoñez</li> <li>W. G. Dunford<sup>3</sup></li> <li>C. Eskicioglu</li> <li><a href="#">Laboratory for Alternative Energy Conversion</a></li> <li>Institute for Integrated Energy Systems (IESVIC)</li> </ul> | <ul style="list-style-type: none"> <li>J. Axsen<sup>2</sup></li> <li>E. Maine<sup>2</sup></li> <li>M. Jaccard<sup>2</sup></li> <li>G. Wang</li> <li>J. Wang</li> <li>Z. Dong</li> <li>R. Sadiq<sup>3</sup></li> <li>J. Jatskevich</li> <li>A. Lau</li> <li><a href="#">Sustainable Transportation Action Research Team</a></li> </ul> |

b)

| Technology Developers                                                               | Transportation & Distribution                                                       | Utilities                                                                           | End-use Applications                                                                  |
|-------------------------------------------------------------------------------------|-------------------------------------------------------------------------------------|-------------------------------------------------------------------------------------|---------------------------------------------------------------------------------------|
|  |  |  |  |



## Supplementary material

### S8 Hydrogen Storage: Energy demand for storing and releasing hydrogen, Global, 2020.

Source: Adopted by the author from the report called “Disruptive Innovations in Production, Storage, and Transportation of Hydrogen” with permission from Ajo Joseph, Frost & Sullivan<sup>5</sup>

| Technology     |                                    | Energy Demand of Energy Conversion Processes, kW/kg Delivered H2 |                            | Operating Costs of Energy Conversion Processes, \$/kg Delivered H2 |                                         |               | Technology Readiness Level (TRL) |                |                                |       |
|----------------|------------------------------------|------------------------------------------------------------------|----------------------------|--------------------------------------------------------------------|-----------------------------------------|---------------|----------------------------------|----------------|--------------------------------|-------|
|                |                                    | Electrical energy                                                | Thermal energy (heat)      | Electrical energy, $\approx 0.15^*$ \$/kWh                         | Thermal energy, $\approx 0.04^*$ \$/kWh | Total         | Conversion to storage carrier    | Transportation | Process for releasing hydrogen | Total |
| Physical-based | Compressed gas                     | 1-2 kWh <sub>el</sub> /kg                                        | -                          | 0.3 \$/kg                                                          | -                                       | 0.3 \$/kg     | 9                                | 8              | 8                              | 8     |
|                | Liquid H <sub>2</sub> <sup>6</sup> | 8 kWh <sub>el</sub> /kg                                          | -                          | 1.2 \$/kg                                                          | -                                       | 1.2 \$/kg     | 7                                | 7              | 6                              | 6     |
| Material-based | Adsorption                         | 6-7 kWh <sub>el</sub> /kg                                        | -                          | 0.9-1.1 \$/kg                                                      | -                                       | 0.9-1.1 \$/kg | 4                                | 5              | 3                              | 3     |
|                | Metal hydride                      | 10 kWh <sub>el</sub> /kg                                         | 10 kWh <sub>h</sub> /kg    | 1.5 \$/kg                                                          | 0.4 \$/kg                               | 1.9 \$/kg     | 5                                | 4              | 5                              | 4     |
|                | Inter-metallic hydride             | 0.8 kWh <sub>el</sub> /kg                                        | 2-6 kWh <sub>h</sub> /kg   | 0.1 \$/kg                                                          | 0.3 \$/kg                               | 0.4 \$/kg     | 3                                | 3              | 3                              | 3     |
|                | Complex hydride                    | 1 kWh <sub>el</sub> /kg                                          | 5-7 kWh <sub>h</sub> /kg   | 0.2 \$/kg                                                          | 0.3 \$/kg                               | 0.5 \$/kg     | 3                                | 3              | 3                              | 3     |
|                | Chemical hydrogen                  | 2-6 kWh <sub>el</sub> /kg                                        | 4-7 kWh <sub>h</sub> /kg   | 0.3-0.9 \$/kg                                                      | 0.3 \$/kg                               | 0.6-1.2 \$/kg | 9                                | 9              | 6                              | 6     |
|                | Liquid organic hydrogen            | 2-3 kWh <sub>el</sub> /kg                                        | 11-35 kWh <sub>h</sub> /kg | 0.3-0.5 \$/kg                                                      | 0.5-1.4 \$/kg                           | 0.8-1.9 \$/kg | 5                                | 6              | 7                              | 5     |

### S9 Hydrogen Storage: Techno-economic Comparison of Liquefied Hydrogen Storage, Global, 2020

Source: Adopted by the author from a report called “Disruptive Innovations in Production, Storage, and Transportation of Hydrogen” with permission from Ajo Joseph, Frost & Sullivan<sup>5</sup>

| Hydrogen Storage Technology                   | Hydrogen Storage densities |                   | Technology Maturity | Energy Conversion Efficiency (%) | Operating Costs, \$/kg delivered H2 | Capital Cost, \$/kg delivered H2 | Delivery Cost, \$/kg delivered H2 |
|-----------------------------------------------|----------------------------|-------------------|---------------------|----------------------------------|-------------------------------------|----------------------------------|-----------------------------------|
|                                               | Volumetric (kg/m3)         | Gravimetric (wt%) |                     |                                  |                                     |                                  |                                   |
| Liquid H <sub>2</sub> <sup>5</sup>            | 70                         | -                 | 6                   | 37.1                             | 1.2                                 | 1.8                              | 0.6                               |
| Chemical H <sub>2</sub> -ammonia <sup>7</sup> | 123                        | 17.7              | 6                   | 36.9                             | 1.1                                 | 1.6                              | 0.3                               |
| Liquid organic H <sub>2</sub> <sup>8</sup>    | 57-64                      | 6.2               | 5                   | 24.7                             | 1.9                                 | 3                                | 0.8                               |

## Supplementary material

### S10 Power-to-H<sub>2</sub> Technology: Technology Comparison, Global, 2020.

Source: Adopted by the author from the report called “Techno-economic Comparison of Power-to-X Technology” with permission from Ajo Joseph, Frost & Sullivan<sup>5</sup> (Techno-economic Comparison of Power-to-X Technology)

### S11 Renewable hydrogen production via electrolysis: Innovation Technology from demonstration-R&D Lab to mature-commercialized<sup>9</sup>

| Electrolyzers                                          | AEC - Mature                                | PEMEC - Commercial                                | SOEC - Demonstration to R&D                                          |
|--------------------------------------------------------|---------------------------------------------|---------------------------------------------------|----------------------------------------------------------------------|
| Electrolyte                                            | Aq. potassium hydroxide (KOH) <sup>10</sup> | Polymer membrane <sup>11 12</sup>                 | Yttria stabilised Zirconia (YSZ) <sup>13</sup>                       |
| Cathode                                                | Ni, Ni-Mo alloys <sup>14 15</sup>           | Pt, Pt-Pd <sup>16</sup>                           | Ni/YSZ <sup>13</sup>                                                 |
| Anode                                                  | Ni, Ni-Co alloys <sup>17</sup>              | RuO <sub>2</sub> , IrO <sub>2</sub> <sup>18</sup> | LSMb/YSZ <sup>19</sup><br>Ce/Ru <sup>20</sup><br>Ce/Ni <sup>21</sup> |
| Cell voltage (V)                                       | 1.8-2.4 <sup>22</sup>                       | 1.8-2.2 <sup>23</sup>                             | 0.7-1.5 <sup>24</sup>                                                |
| Current density<br>(A /cm <sup>2</sup> )               | 0.2-0.4 <sup>25</sup>                       | 0.6- 2.0 <sup>26 27</sup>                         | 0.3-2.0 <sup>28</sup>                                                |
| Voltage efficiency (%HHV)                              | 62- 82 <sup>29</sup>                        | 67-82 <sup>30</sup>                               | < 110 <sup>31</sup>                                                  |
| Cell area (m <sup>2</sup> )                            | < 4 <sup>32</sup>                           | < 0.3 <sup>33</sup>                               | < 0.01 <sup>13</sup>                                                 |
| Operating Temp. (°C)                                   | 60-80 <sup>10 25</sup>                      | 50-80 <sup>34 27</sup>                            | 650-1000 <sup>35 36</sup>                                            |
| Operating Pressure (bar)                               | < 30 <sup>37</sup>                          | <200 <sup>38</sup>                                | <25 <sup>39</sup>                                                    |
| Production Rate<br>(m <sup>3</sup> H <sub>2</sub> / h) | < 760 <sup>40 41</sup>                      | < 40 <sup>42</sup>                                | <40 <sup>32</sup>                                                    |
| Stack energy (kWh / m <sup>3</sup> H <sub>2</sub> )    | 4.2 -5.9 <sup>43</sup>                      | 4.2- 5.5 <sup>44 45</sup>                         | > 3.2 <sup>35</sup>                                                  |
| System energy (kW /m <sup>3</sup> H <sub>2</sub> )     | 4.5-6.6 <sup>46</sup>                       | 4.2-6.6 <sup>47 27</sup>                          | > 3.7 (> 4.7 )kWh-energy <sup>48</sup>                               |
| Capital Cost<br>( \$/kW)                               | 1300 – 1560 <sup>49</sup>                   | 2400- 3000 <sup>50</sup>                          | > 2600 <sup>51</sup>                                                 |
| Stack Lifetime (h)                                     | 60,000- 90,000 <sup>52 53</sup>             | 20,000- 60,000 <sup>44</sup>                      | < 10,000 <sup>54</sup>                                               |

## Supplementary material

**S11** Alternative Fuels Production: Comparative Analysis, Global, 2019.

Source: Adapted by the author from the report “Breakthrough Technologies Advancing the Future of Alternative Fuels Production” with permission from Ajo Joseph, Frost & Sullivan <sup>5</sup>

| Technology                         |                                | Technology Readiness Level (TRL) | Capital Cost   | Production Cost |             | Efficiency, % | Cost efficiency |
|------------------------------------|--------------------------------|----------------------------------|----------------|-----------------|-------------|---------------|-----------------|
|                                    |                                |                                  |                | Hydrogen        | Biofuel     |               |                 |
| <b>Thermochemical and Chemical</b> | Pyrolysis                      | 8                                | \$50 – 650M    | 1 -2.5 \$/kg    | 20-30 \$/GJ | 35-50         | Medium          |
|                                    | Gasification                   | 9                                | \$115 – 150M   | 1.5-2 \$/kg     | 15-60/GJ    | 40-50         | High            |
|                                    | Hydrothermal Liquefaction      | 7                                | \$100-125M     | -               | 20-30 \$/GJ | 20–60         | Medium          |
|                                    | Torrefaction                   | 7                                | \$10-20M       | -               | 42 \$/t     | -             | High            |
|                                    | Esterification                 | 9                                | \$375M         | -               | 20-30 \$/GJ | 40-70         | Medium          |
| <b>Electrolysis</b>                | Low-temperature Electrolysis   | 8                                | 800-1000 \$/kW | 12-55 \$/kg     | -           | 40-80         | High            |
|                                    | High- temperature Electrolysis | 5                                | >1000 \$/kW    | 2-11 \$/kg      | -           | 20-45         | High            |
|                                    | Photo-electrolysis             | 5                                | -              | 10 \$/kg        | -           | 0.06          | Low             |
|                                    | Microbial Electrolysis         | 6                                | 1300 \$/m3     | 3 \$/kg         | -           | 60-80         | High            |

**S12** Hydrogen production pathways via renewables and fossil fuels.<sup>55</sup>

Image source: Adapted by the authors from “Energy Transition Outlook” DNV.

## Supplementary material

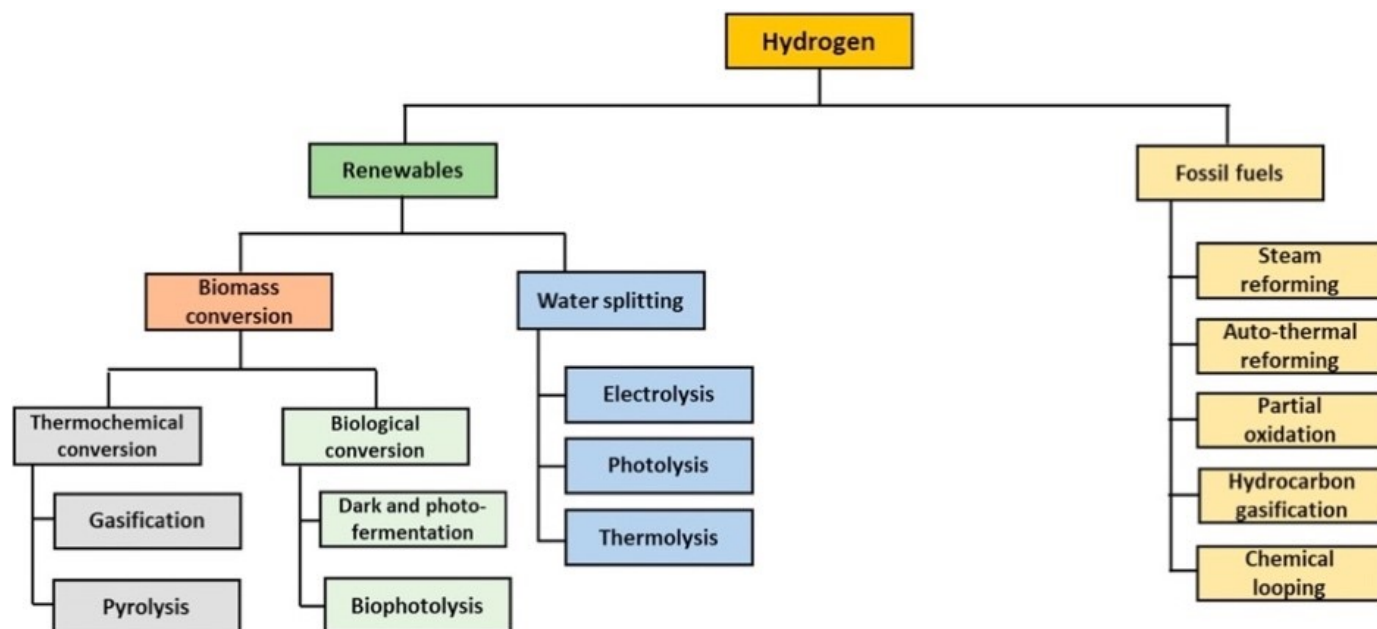

## References:

- 1 The Netherlands Enterprise Agency, *Market Scan of the Canadian Hydrogen Sector Commissioned*, .
- 2 R&D Labs at Simon Fraser University, .
- 3 R&D Labs at University of British Columbia, .
- 4 R&D Labs at University of Victoria, .
- 5 A. Joseph et al, *Innovations in Production, Storage, and Transportation of Hydrogen*, Frost & Sullivan, 2020.
- 6 A. Hafsia, Z. Bariza, H. Djamel, B. M. Hocine, G. M. Andreadis and A. Soumia, *Impact Integr. Clean Energy Future Mediterr. Environ.*, 2011, **6**, 643–650.
- 7 Wärtsilä Corp., *Wärtsilä launches major test programme towards carbon-free solutions with hydrogen and ammonia*, 2021.
- 8 UBC Sustainability, *Clean Energy Research Centre Seminar*, 2021.
- 9 Z. Abdin, A. Zafaranloo, A. Rafiee, W. Merida, W. Lipinski and K. R. Khalilpour, *Renew. Sustain. Energy Rev.*, 2020, **120**, 109620.
- 10 A. Mani and V. I. Birss, *Electrochimica Acta*, 2013, **105**, 170–179.
- 11 Ionomr Inc., *Renewable hydrogen production*, 2023.
- 12 X. Luo, S. Chen, Z. Xia, X. Zhang, W. Yuan and Y. Wu, *Appl. Sci.-Basel*, 2019, **9**, 4863.
- 13 J. Nielsen and J. Hjelm, *Electrochimica Acta*, 2014, **115**, 31–45.
- 14 S. N. Hasan, M. Xu and E. Asselin, *Can. Metall. Q.*, 2019, **58**, 1–18.

## Supplementary material

- 15 L. Wang, T. Weissbach, R. Reissner, A. Ansar, A. S. Gago, S. Holdcroft and K. A. Friedrich, *Acs Appl. Energy Mater.*, 2019, **2**, 7903–7912.
- 16 M. Torihata, M. Nakamura, N. Todoroki, T. Wadayama and N. Hoshi, *Electrochem. Commun.*, 2021, **125**, 107007.
- 17 F. Ganci, V. Cusumano, P. Livreri, G. Aiello, C. Sunseri and R. Inguanta, *Int. J. Hydrog. Energy*, 2021, **46**, 10082–10092.
- 18 K. S. Exner, *Chemelectrochem*, 2021, **8**, 46–48.
- 19 T. Jiang, J. Gao, Z. Jin, K. Hu, Q. Yuan and H.-J. Qiu, *Mater. Today Energy*, 2021, **21**, 100835.
- 20 B. Li, S. He, J. Li, X. Yue, J. T. S. Irvine, D. Xie, J. Ni and C. Ni, *Acs Catal.*, 2020, **10**, 14398–14409.
- 21 A. N. Tabish, H. C. Patel, A. Mani, J. Schoonman and P. V. Aravind, *Electrochimica Acta*, 2022, **423**, 9.
- 22 P. K. Giesbrecht, A. M. Muller, C. G. Read, S. Holdcroft, N. S. Lewis and M. S. Freund, *Sustain. Energy Fuels*, 2019, **3**, 3611–3626.
- 23 J. Zhu, S. Wu, X. Luo and S. Liu, *2014 17th Int. Conf. Electr. Mach. Syst. Icems*, 2014, 308–313.
- 24 P. R. Shearing, D. J. L. Brett and N. P. Brandon, *Int. Mater. Rev.*, 2010, **55**, 347–363.
- 25 P. Fortin, T. Khoza, X. Cao, S. Y. Martinsen, A. O. Barnett and S. Holdcroft, *J. Power Sources*, 2020, **451**, 227814.
- 26 X. Luo, L. Ghassemzadeh and S. Holdcroft, *Int. J. Hydrog. Energy*, 2015, **40**, 16714–16723.
- 27 L. Xing, W. Shi, H. Su, Q. Xu, P. K. Das, B. Mao and K. Scott, *Energy*, 2019, **177**, 445–464.
- 28 H. Takeuchi, H. Nishiyama, A. Ueno, S. Aikawa, M. Aizawa, H. Tajiri, T. Nakayama, S. Suehiro and K. Shukuri, *Solid Oxide Fuel Cells Sofc Vi*, 1999, **99**, 879–884.
- 29 K. Zeng and D. Zhang, *Prog. Energy Combust. Sci.*, 2010, **36**, 307–326.
- 30 M. Carmo, D. L. Fritz, J. Merge and D. Stolten, *Int. J. Hydrog. Energy*, 2013, **38**, 4901–4934.
- 31 T. Horita, *Energy Technol. 2016 Carbon Dioxide Manag. Technol.*, 2016, 163–170.
- 32 T. T. Nguyen, , DOI:<https://dx.doi.org/10.14288/1.0385113>.
- 33 K. Nagasawa, T. Ishida, H. Kashiwagi, Y. Sano and S. Mitsushima, *Int. J. Hydrog. Energy*, 2021, **46**, 36619–36628.
- 34 X. Luo, G. Lau, M. Tesfaye, C. R. Arthurs, I. Cordova, C. Wang, M. Yandrasits and A. Kusoglu, *J. Electrochem. Soc.*, 2021, **168**, 104517.
- 35 Z. Zeng, Y. Qian, Y. Zhang, C. Hao, D. Dan and W. Zhuge, *Appl. Energy*, 2020, **280**, 115899.
- 36 L. Fan, B. Zhu, P.-C. Su and C. He, *Nano Energy*, 2018, **45**, 148–176.
- 37 D. Todd, M. Schwager and W. Merida, *J. Power Sources*, 2014, **269**, 424–429.
- 38 T. Holm, T. Borsboom-Hanson, O. E. Herrera and W. Merida, *Energy Convers. Manag.*, 2021, **237**, 114106.
- 39 J. Milewski, J. Kupecki, A. Szczesniak and N. Uzunow, *Int. J. Hydrog. Energy*, 2021, **46**, 35765–35776.
- 40 S. Brynolf, M. Taljegard, M. Grahn and J. Hansson, *Renew. Sustain. Energy Rev.*, 2018, **81**, 1887–1905.

## Supplementary material

- 41 F. Xiao, Y.-C. Wang, Z.-P. Wu, G. Chen, F. Yang, S. Zhu, K. Siddharth, Z. Kong, A. Lu, J.-C. Li, C.-J. Zhong, Z.-Y. Zhou and M. Shao, *Adv. Mater.*, 2021, **33**, 2006292.
- 42 V. J. Thomas and E. Maine, *J. Clean. Prod.*, 2019, **235**, 653–663.
- 43 G. Zhao, M. R. Kraglund, H. L. Frandsen, A. C. Wulff, S. H. Jensen, M. Chen and C. R. Graves, *Int. J. Hydrog. Energy*, 2020, **45**, 23765–23781.
- 44 H. Niu, C. Ji, S. Wang and C. Liang, *Int. J. Hydrog. Energy*, 2022, **47**, 2647–2661.
- 45 J. I. S. Cho, J. Marquis, P. Trogadas, T. P. Neville, D. J. L. Brett and M.-O. Coppens, *Chem. Eng. Sci.*, 2020, **215**, 115375.
- 46 A. Mohammadi and M. Mehrpooya, *Energy*, 2018, **158**, 632–655.
- 47 T. L. Doan, H. E. Lee, S. S. H. Shah, M. Kim, C.-H. Kim, H.-S. Cho and T. Kim, *Int. J. Energy Res.*, 2021, **45**, 14207–14220.
- 48 L. A. S. Zompansi, M. A. R. Toral, R. R. Rodriguez and L. A. G. Serrano, *Energy-Effic. Cost-Eff. Environ.-Sustain. Syst. Process. Vols 1-3*, 2004, 717–732.
- 49 T. G. Douglas, A. Cruden and D. Infield, *Int. J. Hydrog. Energy*, 2013, **38**, 723–739.
- 50 F. Elmanakhly, A. DaCosta, B. Berry, R. Stasko, M. Fowler and X.-Y. Wu, *Aims Energy*, 2021, **9**, 775–811.
- 51 M. Maier, K. Smith, J. Dodwell, G. Hinds, P. R. Shearing and D. J. L. Brett, *Int. J. Hydrog. Energy*, 2022, **47**, 30–56.
- 52 M. A. Khan, I. Al-Shankiti, A. Ziani and H. Idriss, *Sustain. Energy Fuels*, 2021, **5**, 1085–1094.
- 53 D. R. Dekel, I. G. Rasin and S. Brandon, *J. Power Sources*, 2019, **420**, 118–123.
- 54 S. Haeefe, M. Hauck and J. Dailly, *Int. J. Hydrog. Energy*, 2016, **41**, 13786–13796.
- 55 DNV core team, Steering committee: Remi Eriksen, Ditlev Engel, Ulrike, Haugen, Trond Hodne, Liv Hovem, Project director: Sverre Alvik, and Modelling responsible: Onur Özgün, *Energy Transition Outlook*, DNV, 2021.
